# Supplementary material for: The genomic landscape of human cellular circadian variation points to a novel role for the signalosome
Source: eLife. 2017 Sep 4;6:e24994. doi: 10.7554/eLife.24994 (PMC5601996; doi:10.7554/eLife.24994)
Supplement: Figure 1—source data 1. — The closest annotated gene is indicated for each SNP, as well as the unadjusted GWAS p-value. [file elife-24994-fig1-data1.xlsx]

## Sheet: Table S1
Gene Id	Ensemble Description	SNP	P-value
ADAMTS9-AS2	ADAMTS9 antisense RNA 2	rs76244934	5.12e-06
BC029835	n/a	rs17561832	9.3e-06
LINC01467	long intergenic non-protein coding RNA 1467	rs17561832	9.3e-06
BOLA2	bolA family member 2	rs8047140	1.85e-05
CDIPT	CDP-diacylglycerol--inositol 3-phosphatidyltransferase	rs8047140	1.85e-05
ASPHD1	aspartate beta-hydroxylase domain containing 1	rs8047140	1.85e-05
COPS7B	COP9 signalosome subunit 7B	rs920400	1.07e-07
NPPC	natriuretic peptide C	rs13397384	3.15e-07
PDE6D	Phosphodiesterase 6D	rs920400	1.07e-07
CPE	Carboxypeptidase E	rs4690815	1.49e-05
MIR578	MicroRNA 578	rs4690815	1.49e-05
ESR1	Estrogen receptor 1	rs4546453	9.37e-06
FAM221A	Family with sequence similarity 221 member A	rs17779517	8.54e-06
FRY	FRY microtubule binding protein	kgp4424737	8.01e-06
LOC100505797	myosin heavy chain IB-like	kgp11034086	1.04e-05
NETO1	Neuropilin and tolloid like 1	rs28479302	1.65e-05
MIR548A2	MicroRNA 548a-2	rs10510919	9.21e-06
PKN1	Protein kinase N1	rs28364035	4.79e-06
PTGER1	Prostaglandin E receptor 1	rs28364035	4.79e-06
GIPC1	GIPC PDZ domain containing family member 1	rs28364035	4.79e-06
SOX13	SRY-box 13	rs56005111	1.76e-05
ETNK2	Ethanolamine kinase 2	rs56005111	1.76e-05
SPACA7	Sperm acrosome associated 7	rs7328026	1.64e-05
CNTN6	Contactin 6	rs1499118	1.85e-05
CSMD1	CUB and Sushi multiple domains 1	kgp453731	1.91e-05
DACT1	Dishevelled binding antagonist of beta catenin 1	rs422683	1.07e-07
FAR2	Fatty acyl-CoA reductase 2	rs7976184	2.13e-05
KL	Klotho	rs17517282	5.33e-06
LINC00423	Long intergenic non-protein coding RNA 423	rs17517282	5.33e-06
LMO1	LIM domain only 1	rs2290450	1.44e-05
PPP2R5C	Protein phosphatase 2 regulatory subunit B,gamma	kgp3105015	5.46e-06
SCD5	Stearoyl-CoA desaturase 5	rs10030631	2.22e-05
ARFGAP3	ADP ribosylation factor GTPase activating protein 3	rs4822197	1.42e-05
ARMC4	Armadillo repeat containing 4	rs72801826	9.9e-06
MPP7	Membrane palmitoylated protein 7	rs72801826	9.9e-06
CDC7	Cell division cycle 7	rs3851269	6.11e-06
HFM1	HFM1, ATP dependent DNA helicase homolog	rs148487252	1.22e-05
DSCAM	DS cell adhesion molecule	kgp2356019	1.26e-05
KCNE4	Potassium voltage-gated channel subfamily E regulatory subunit 4	rs1550423	9.89e-06
MGMT	O-6-methylguanine-DNA methyltransferase	kgp4613661	1.79e-05
NARS2	Asparaginyl-tRNA synthetase 2, mitochondrial (putative)	rs7928933	5e-06
PLXDC2	Plexin domain containing 2	rs11591599	1.92e-05
SHISA6	Shisa family member 6	rs11870383	1.07e-05
SLC34A2	Solute carrier family 34 member 2	rs3796777	1.81e-05
STOX2	Storkhead box 2	kgp12389782	1.49e-05
TRIM5	Tripartite motif containing 5	rs11038872	1.06e-05
TRIM22	Tripartite motif containing 22	rs11038872	1.06e-05
WWTR1	WW domain containing transcription regulator 1	rs722420	4.85e-06
C7orf49	Chromosome 7 open reading frame 49	rs10241991	1.74e-05
LOC653739	uncharacterized	rs11761570	4.1e-06
E4BP41L2	n/a	rs12662005	1.06e-05
ESRP1	Epithelial splicing regulatory protein 1	rs6471454	2.46e-06
GAS7	Growth arrest specific 7	kgp4208840	1.89e-05
LMX1A	LIM homeobox transcription factor 1 alpha	rs10918142	4.05e-06
RGS3	regulator of G-protein signaling 3	rs10981830	1.58e-05
SSBP2	single stranded DNA binding protein 2	rs2047734	1.09e-05
ST6GAL2	ST6 beta-galactoside alpha-2,6-sialyltransferase 2	rs6729112	1.39e-05
STIM2	stromal interaction molecule 2	rs6822764	1.63e-05
ZNF366	zinc finger protein 366	kgp5478310	1.75e-05
PPM1B	Protein Phosphatase, Mg2+/Mn2+ Dependent 1B	rs4953137	RTC < 0.9

## Sheet: Supplementary Dataset 1A
PER1
SNP Id	Chromosome	Position	P-value	Genes
rs422683	14	59197787	1.07e-07	DACT1
kgp12187413	14	59198137	1.24e-07	DACT1
rs311850	14	59195739	1.24e-07	DACT1
rs311854	14	59193020	1.24e-07	DACT1
rs311874	14	59209182	1.34e-07	DACT1
kgp2017236	14	59195404	1.87e-07	DACT1
kgp373938	14	59195994	1.87e-07	DACT1
rs1119783	14	59197545	1.87e-07	DACT1
rs182582	14	59209282	4.38e-07	DACT1
rs750993	14	59210333	1.09e-06	DACT1
kgp1289291	14	59214702	4.8e-06	DACT1
rs856381	14	59208640	4.88e-06	DACT1
rs17517282	13	33547298	5.33e-06	KL,LINC00423
kgp3105015	14	102342495	5.46e-06	PPP2R5C
rs710008	14	59184596	1.31e-05	DACT1
rs710009	14	59184500	1.31e-05	DACT1
rs710011	14	59183275	1.31e-05	DACT1
rs2290450	11	8248482	1.44e-05	LMO1
rs856288	14	59184103	1.53e-05	DACT1
rs1499118	3	1366653	1.85e-05	CNTN6
kgp453731	8	4240580	1.91e-05	CSMD1
rs7976184	12	29299983	2.13e-05	FAR2
rs10030631	4	83596745	2.22e-05	SCD5

## Sheet: Suppl. Dataset 1B
PER2
SNP Id	Chromosome	Position	P-value	Genes
rs920400	2	232717857	1.07e-07	COPS7B,PDE6D
rs10195385	2	232720739	1.95e-07	COPS7B
kgp6451586	2	232714531	3.15e-07	COPS7B,NPPC
rs13397384	2	232713695	3.15e-07	COPS7B,NPPC
rs3856541	2	232714442	3.15e-07	COPS7B,NPPC
rs4040722	2	232714637	3.15e-07	COPS7B,NPPC
rs10208197	2	232633169	4.68e-07	COPS7B,NPPC
rs13424754	2	232647754	4.68e-07	COPS7B,NPPC
rs1464975	2	232631570	4.68e-07	COPS7B,NPPC
rs6732581	2	232648658	4.68e-07	COPS7B,NPPC
rs838443	2	232611142	5.61e-07	COPS7B,NPPC
rs838446	2	232609868	5.61e-07	COPS7B,NPPC
kgp6480631	2	232604786	8.36e-07	COPS7B,NPPC
rs1097849	2	232613916	8.36e-07	COPS7B,NPPC
rs1246075	2	232603412	8.36e-07	COPS7B,NPPC
rs1464976	2	232631846	8.36e-07	COPS7B,NPPC
rs4555339	2	232669078	8.36e-07	COPS7B,NPPC
rs6437035	2	232636444	8.36e-07	COPS7B,NPPC
rs838447	2	232609756	8.36e-07	COPS7B,NPPC
rs865706	2	232622001	8.36e-07	COPS7B,NPPC
rs11691808	2	232629656	1.17e-06	COPS7B,PDE6D
rs4134454	2	232628532	1.17e-06	COPS7B,PDE6D
rs62197242	2	232600676	1.17e-06	COPS7B,PDE6D
rs62198564	2	232637839	1.17e-06	COPS7B,PDE6D
rs67585372	2	232637629	1.17e-06	COPS7B,PDE6D
rs8165	2	232597475	1.17e-06	COPS7B,PDE6D
rs28364035	19	14586126	4.79e-06	PKN1,PTGER1,GIPC1
rs28364039	19	14586044	4.79e-06	PKN1,PTGER1,GIPC1
kgp7907277	3	64932488	5.12e-06	ADAMTS9-AS2
rs76244934	3	64931449	5.12e-06	ADAMTS9-AS2
rs79379576	3	64931682	5.12e-06	ADAMTS9-AS2
kgp4424737	13	32846031	8.01e-06	FRY
kgp1463231	7	23705430	8.54e-06	FAM221A
rs17779517	7	23709939	8.54e-06	FAM221A
rs2109346	7	23705717	8.54e-06	FAM221A
rs2159493	7	23705799	8.54e-06	FAM221A
rs7458966	7	23708277	8.54e-06	FAM221A
kgp6277094	3	64914996	9.21e-06	MIR548A2,ADAMTS9-AS2
rs10510919	3	64917639	9.21e-06	MIR548A2,ADAMTS9-AS2
rs17071809	3	64915106	9.21e-06	MIR548A2,ADAMTS9-AS2
rs58291830	3	64913353	9.21e-06	MIR548A2,ADAMTS9-AS2
rs728269	3	64916123	9.21e-06	MIR548A2,ADAMTS9-AS2
rs75225182	3	64929457	9.21e-06	MIR548A2,ADAMTS9-AS2
rs7643165	3	64912197	9.21e-06	MIR548A2,ADAMTS9-AS2
rs76968769	3	64914061	9.21e-06	MIR548A2,ADAMTS9-AS2
rs77449322	3	64924937	9.21e-06	MIR548A2,ADAMTS9-AS2
rs77667077	3	64911852	9.21e-06	MIR548A2,ADAMTS9-AS2
rs78739239	3	64924089	9.21e-06	MIR548A2,ADAMTS9-AS2
rs78819804	3	64930243	9.21e-06	MIR548A2,ADAMTS9-AS2
rs79002090	3	64919417	9.21e-06	MIR548A2,ADAMTS9-AS2
rs79008812	3	64921163	9.21e-06	MIR548A2,ADAMTS9-AS2
rs79314172	3	64928863	9.21e-06	MIR548A2,ADAMTS9-AS2
rs79641344	3	64924271	9.21e-06	MIR548A2,ADAMTS9-AS2
PER2
SNP Id	Chromosome	Position	P-value	Genes
rs17561832	14	82057276	9.3e-06	BC029835,LINC01467
rs7159206	14	82065582	9.3e-06	BC029835,LINC01467
rs4546453	6	83911719	9.37e-06	ESR1
kgp6631336	6	152052043	9.75e-06	ESR1
rs2982564	6	152052215	9.75e-06	ESR1
kgp11034086	18	70545787	1.04e-05	LOC100505797
kgp2153651	2	232635146	1.05e-05	PDE6D,COPS7B
rs13425658	2	232641258	1.05e-05	PDE6D,COPS7B
rs1965569	2	232631731	1.05e-05	PDE6D,COPS7B
rs6437036	2	232640770	1.05e-05	PDE6D,COPS7B
rs10139740	14	82065313	1.13e-05	BC029835,LINC01467
rs12588879	14	82057593	1.13e-05	BC029835,LINC01467
rs1957533	14	82058813	1.13e-05	BC029835,LINC01467
rs4903990	14	82057699	1.13e-05	BC029835,LINC01467
rs6574665	14	82056731	1.13e-05	BC029835,LINC01467
rs7159238	14	82065638	1.13e-05	BC029835,LINC01467
rs8004519	14	82057123	1.13e-05	BC029835,LINC01467
rs8004615	14	82056976	1.13e-05	BC029835,LINC01467
rs8004807	14	82057116	1.13e-05	BC029835,LINC01467
kgp6538676	2	232604360	1.3e-05	PDE6D,COPS7B
rs1246073	2	232605509	1.3e-05	PDE6D,COPS7B
rs2570991	2	232608294	1.3e-05	PDE6D,COPS7B
rs6719408	2	232617205	1.3e-05	PDE6D,COPS7B
rs838442	2	232612378	1.3e-05	PDE6D,COPS7B
rs838445	2	232609958	1.3e-05	PDE6D,COPS7B
rs838448	2	232607456	1.3e-05	PDE6D,COPS7B
rs4903992	14	82063107	1.46e-05	BC029835,LINC01467
rs9671719	14	82062803	1.46e-05	BC029835,LINC01467
rs4690815	4	166320814	1.49e-05	CPE,MIR578
rs6850887	4	166321476	1.49e-05	CPE,MIR578
rs7328026	13	113074202	1.64e-05	SPACA7
rs28479302	18	70552972	1.65e-05	LOC100505797,NETO1
rs9945533	18	70554289	1.65e-05	LOC100505797,NETO1
rs9962788	18	70553044	1.65e-05	LOC100505797,NETO1
kgp1000280	14	82063251	1.74e-05	BC029835,LINC01467
rs10147009	14	82060944	1.74e-05	BC029835,LINC01467
rs11845776	14	82060204	1.74e-05	BC029835,LINC01467
rs11847155	14	82061638	1.74e-05	BC029835,LINC01467
rs11849505	14	82063899	1.74e-05	BC029835,LINC01467
rs17562204	14	82061877	1.74e-05	BC029835,LINC01467
rs28704952	14	82060328	1.74e-05	BC029835,LINC01467
rs4899789	14	82060635	1.74e-05	BC029835,LINC01467
rs4903991	14	82057804	1.74e-05	BC029835,LINC01467
rs4903994	14	82063424	1.74e-05	BC029835,LINC01467
rs4903995	14	82063457	1.74e-05	BC029835,LINC01467
rs4903996	14	82063463	1.74e-05	BC029835,LINC01467
rs4903997	14	82063522	1.74e-05	BC029835,LINC01467
rs4903998	14	82063583	1.74e-05	BC029835,LINC01467
rs61308469	14	82062298	1.74e-05	BC029835,LINC01467
rs67700870	14	82062195	1.74e-05	BC029835,LINC01467
kgp12453281	1	204062408	1.76e-05	SOX13,ETNK2
rs56005111	1	204062681	1.76e-05	SOX13,ETNK2
rs7528560	1	204061744	1.76e-05	SOX13,ETNK2
rs8047140	16	29922988	1.85e-05	BOLA2,CDIPT,ASPHD1
rs7158907	14	82065557	1.94e-05	BC029835,LINC01467

## Sheet: Suppl. Dataset 1C
AMPLITUDE
SNP Id	Chromosome	Position	P-value	Genes
rs4842071	9	138902297	9.53e-07	NACC2
rs7862443	9	138901600	9.53e-07	NACC2
rs4842072	9	138902592	2.28e-06	NACC2
rs1483121	11	48333360	2.46e-06	OR4S1,OR4C3
rs7107291	11	48335505	2.46e-06	OR4S1 OR4C3
kgp11323124	17	79583371	5.94e-06	NPLOC4,TSPAN10,PDE6G
kgp5426434	17	79557043	5.94e-06	NPLOC4,TSPAN10,PDE6G
rs112364254	17	79578287	5.94e-06	NPLOC4,TSPAN10,PDE6G
rs11650127	17	79572253	5.94e-06	NPLOC4,TSPAN10,PDE6G
rs11656126	17	79564542	5.94e-06	NPLOC4,TSPAN10,PDE6G
rs12948708	17	79558741	5.94e-06	NPLOC4,TSPAN10,PDE6G
rs12953229	17	79554271	5.94e-06	NPLOC4,TSPAN10,PDE6G
rs71373084	17	79564930	5.94e-06	NPLOC4,TSPAN10,PDE6G
rs7503894	17	79583473	5.94e-06	NPLOC4,TSPAN10,PDE6G
rs6420484	17	79612397	6.28e-06	NPLOC4,TSPAN10,PDE6G
kgp154301	9	138901678	6.37e-06	OR4S1,OR4C3
kgp8025267	4	5846325	8.49e-06	CRMP1,EVC
rs1975349	19	12222861	8.95e-06	ZNF788,ZNF20
kgp12495760	3	190246861	1.03e-05	IL1RAP
rs9861301	3	190246860	1.03e-05	IL1RAP
rs3019200	11	61249383	1.07e-05	PPP1R32
rs1516302	3	7208953	1.16e-05	GRM7
rs3757105	6	73893677	1.27e-05	KCNQ5
rs9576636	13	39471709	1.33e-05	FREM2
rs9576637	13	39471801	1.33e-05	FREM2
rs6467626	7	135710244	1.44e-05	LUZP6
rs7798858	7	135710436	1.44e-05	LUZP6
rs1974068	10	14815820	1.47e-05	FAM107B
rs74590832	7	45716903	1.59e-05	ADCY1
kgp9343835	6	73887758	1.59e-05	KCNQ5
kgp9888063	10	89976544	1.66e-05	RNLS

## Sheet: Suppl. Dataset 1D
PHASE
SNP Id	Chromosome	Position	P-value	Genes
rs722420	3	149400057	4.85e-06	WWTR1
rs7928933	11	78193921	5e-06	NARS2
rs3851269	1	91917282	6.11e-06	CDC7
rs2930376	8	3761981	6.33e-06	CSMD1
rs908003	11	78190340	6.69e-06	NARS2
kgp6343367	11	78206157	8.71e-06	NARS2
rs7941889	11	78154401	8.71e-06	NARS2
kgp7469345	11	78251244	8.82e-06	NARS2
rs10793326	11	78255422	8.82e-06	NARS2
rs10793328	11	78256868	8.82e-06	NARS2
rs4579956	11	78232445	8.82e-06	NARS2
rs6592784	11	78234790	8.82e-06	NARS2
rs6592789	11	78246767	8.82e-06	NARS2
rs7106931	11	78229612	8.82e-06	NARS2
rs10793322	11	78242615	8.84e-06	NARS2
rs58468524	21	19636143	9.19e-06	NARS2
rs73206966	21	19636177	9.19e-06	NARS2
rs73318254	21	19631561	9.19e-06	NARS2
kgp695713	1	91894821	9.39e-06	CDC7
rs7944485	11	78225261	9.56e-06	NARS2
rs1550423	2	223885812	9.89e-06	KCNE4
rs72801826	10	28312990	9.9e-06	ARMC4,MPP7
rs963910	1	92014136	1.03e-05	CDC7
rs11166498	1	91895432	1.06e-05	CDC7
rs11166539	1	91899561	1.06e-05	CDC7
rs12133386	1	91899300	1.06e-05	CDC7
rs7529485	1	91898253	1.06e-05	CDC7
rs11038872	11	5750552	1.06e-05	TRIM5,TRIM22
rs11038878	11	5751515	1.06e-05	TRIM5,TRIM22
rs12284806	11	5748826	1.06e-05	TRIM5,TRIM22
rs11870383	17	11154824	1.07e-05	SHISA6
rs12118616	1	91920428	1.1e-05	CDC7
rs74528896	1	91910730	1.1e-05	CDC7
kgp2026829	11	78204299	1.11e-05	NARS2
rs4474465	11	78204380	1.11e-05	NARS2
rs4474466	11	78204406	1.11e-05	NARS2
rs7945881	11	78177619	1.12e-05	NARS2
rs148487252	1	91910388	1.22e-05	CDC7,HFM1
rs2688288	8	3764615	1.23e-05	CSMD1
kgp2356019	21	41513010	1.26e-05	DSCAM
rs6660157	1	91905739	1.36e-05	CDC7,HFM1
rs7521598	1	91907395	1.36e-05	CDC7,HFM1
kgp2634711	11	78179357	1.41e-05	NARS2
rs111826759	11	78154148	1.41e-05	NARS2
rs11237500	11	78163636	1.41e-05	NARS2
rs11237514	11	78180179	1.41e-05	NARS2
rs12272791	11	78159426	1.41e-05	NARS2
rs1567889	11	78147055	1.41e-05	NARS2
rs6592779	11	78197283	1.41e-05	NARS2
rs7102316	11	78149365	1.41e-05	NARS2
rs7131199	11	78192148	1.41e-05	NARS2
rs966456	11	78168603	1.41e-05	NARS2
rs4822197	22	43175959	1.42e-05	ARFGAP3
kgp12389782	4	184850894	1.49e-05	STOX2
PHASE
SNP Id	Chromosome	Position	P-value	Genes
kgp1191902	21	41513594	1.53e-05	DSCAM
rs11701057	21	41514315	1.53e-05	DSCAM
rs11701139	21	41514421	1.53e-05	DSCAM
rs13046190	21	41513421	1.53e-05	DSCAM
rs13046360	21	41513463	1.53e-05	DSCAM
rs2837452	21	41515029	1.53e-05	DSCAM
rs484417	1	91933106	1.53e-05	CDC7,HFM1
rs496860	1	91936385	1.53e-05	CDC7,HFM1
rs556435	1	91934989	1.53e-05	CDC7,HFM1
rs567104	1	91930433	1.53e-05	CDC7,HFM1
rs10874785	1	92015243	1.59e-05	CDC7,HFM1
rs10793315	11	78190716	1.63e-05	NARS2
rs10899522	11	78190763	1.63e-05	NARS2
rs11237518	11	78193544	1.63e-05	NARS2
rs7925034	11	78193242	1.63e-05	NARS2
rs7936472	11	78175258	1.63e-05	NARS2
rs10793321	11	78237566	1.63e-05	NARS2
rs4245460	11	78258147	1.63e-05	NARS2
kgp10610707	1	92022745	1.75e-05	CDC7,HFM1
rs10899509	11	78170811	1.78e-05	NARS2
kgp4613661	10	131568746	1.79e-05	MGMT
rs28582516	17	11159127	1.8e-05	SHISA6
rs3796777	4	25674194	1.81e-05	SLC34A2
kgp12328218	1	92012154	1.84e-05	CDC7,HFM1
rs11237537	11	78248397	1.89e-05	NARS2
kgp4157344	10	20481971	1.92e-05	PLXDC2
rs11591599	10	20490411	1.92e-05	PLXDC2
rs17699919	10	20482571	1.92e-05	PLXDC2
rs74747110	10	20491244	1.92e-05	PLXDC2
rs4791455	17	11158773	1.92e-05	SHISA6
rs28631715	1	92022049	1.97e-05	CDC7,HFM1

## Sheet: Suppl. Dataset 1E
PHASE
SNP Id	Chromosome	Position	P-value	Genes
kgp1191902	21	41513594	1.53e-05	DSCAM
rs11701057	21	41514315	1.53e-05	DSCAM
rs11701139	21	41514421	1.53e-05	DSCAM
rs13046190	21	41513421	1.53e-05	DSCAM
rs13046360	21	41513463	1.53e-05	DSCAM
rs2837452	21	41515029	1.53e-05	DSCAM
rs484417	1	91933106	1.53e-05	CDC7,HFM1
rs496860	1	91936385	1.53e-05	CDC7,HFM1
rs556435	1	91934989	1.53e-05	CDC7,HFM1
rs567104	1	91930433	1.53e-05	CDC7,HFM1
rs10874785	1	92015243	1.59e-05	CDC7,HFM1
rs10793315	11	78190716	1.63e-05	NARS2
rs10899522	11	78190763	1.63e-05	NARS2
rs11237518	11	78193544	1.63e-05	NARS2
rs7925034	11	78193242	1.63e-05	NARS2
rs7936472	11	78175258	1.63e-05	NARS2
rs10793321	11	78237566	1.63e-05	NARS2
rs4245460	11	78258147	1.63e-05	NARS2
kgp10610707	1	92022745	1.75e-05	CDC7,HFM1
rs10899509	11	78170811	1.78e-05	NARS2
kgp4613661	10	131568746	1.79e-05	MGMT
rs28582516	17	11159127	1.8e-05	SHISA6
rs3796777	4	25674194	1.81e-05	SLC34A2
kgp12328218	1	92012154	1.84e-05	CDC7,HFM1
rs11237537	11	78248397	1.89e-05	NARS2
kgp4157344	10	20481971	1.92e-05	PLXDC2
rs11591599	10	20490411	1.92e-05	PLXDC2
rs17699919	10	20482571	1.92e-05	PLXDC2
rs74747110	10	20491244	1.92e-05	PLXDC2
rs4791455	17	11158773	1.92e-05	SHISA6
rs28631715	1	92022049	1.97e-05	CDC7,HFM1
