# Supplementary material for: The genomic landscape of human cellular circadian variation points to a novel role for the signalosome
Source: eLife. 2017 Sep 4;6:e24994. doi: 10.7554/eLife.24994 (PMC5601996; doi:10.7554/eLife.24994)
Supplement: Figure 3—source data 1. [file elife-24994-fig3-data1.xlsx]

## Sheet: Sheet1
cellular metabolic process	GO:0044237
adjP=0.0010
LMO1	LMO1	LIM domain only 1 (rhombotin 1)
GAS7	GAS7	growth arrest-specific 7
TRIM5	TRIM5	tripartite motif containing 5
ESRP1	ESRP1	epithelial splicing regulatory protein 1
ZNF366	ZNF366	zinc finger protein 366
SCD5	SCD5	stearoyl-CoA desaturase 5
ETNK2	ETNK2	ethanolamine kinase 2
GIPC1	GIPC1	GIPC PDZ domain containing family, member 1
TRIM22	TRIM22	tripartite motif containing 22
SSBP2	SSBP2	single-stranded DNA binding protein 2
PKN1	PKN1	protein kinase N1
CDIPT	CDIPT	CDP-diacylglycerol--inositol 3-phosphatidyltransferase
PPM1B	PPM1B	protein phosphatase, Mg2+/Mn2+ dependent, 1B
PDE6D	PDE6D	phosphodiesterase 6D, cGMP-specific, rod, delta
FRY	FRY	furry homolog (Drosophila)
CDC7	CDC7	cell division cycle 7 homolog (S. cerevisiae)
DACT1	DACT1	dapper, antagonist of beta-catenin, homolog 1 (Xenopus laevis)
RGS3	RGS3	regulator of G-protein signaling 3
COPS7B	COPS7B	COP9 constitutive photomorphogenic homolog subunit 7B (Arabidopsis)
FAR2	FAR2	fatty acyl CoA reductase 2
CPE	CPE	carboxypeptidase E
NPPC	NPPC	natriuretic peptide C
NARS2	NARS2	asparaginyl-tRNA synthetase 2, mitochondrial (putative)
DSCAM	DSCAM	Down syndrome cell adhesion molecule
KL	KL	klotho
MGMT	MGMT	O-6-methylguanine-DNA methyltransferase
SOX13	SOX13	SRY (sex determining region Y)-box 13
WWTR1	WWTR1	WW domain containing transcription regulator 1
PPP2R5C	PPP2R5C	protein phosphatase 2, regulatory subunit B', gamma
LMX1A	LMX1A	LIM homeobox transcription factor 1, alpha
ARFGAP3	ARFGAP3	ADP-ribosylation factor GTPase activating protein 3
ESR1	ESR1	estrogen receptor 1
ASPHD1	ASPHD1	aspartate beta-hydroxylase domain containing 1
ST6GAL2	ST6GAL2	ST6 beta-galactosamide alpha-2,6-sialyltranferase 2
primary metabolic process	GO:0044238
adjP=0.0039
LMO1	LMO1	LIM domain only 1 (rhombotin 1)
GAS7	GAS7	growth arrest-specific 7
TRIM5	TRIM5	tripartite motif containing 5
ESRP1	ESRP1	epithelial splicing regulatory protein 1
ZNF366	ZNF366	zinc finger protein 366
SCD5	SCD5	stearoyl-CoA desaturase 5
ETNK2	ETNK2	ethanolamine kinase 2
GIPC1	GIPC1	GIPC PDZ domain containing family, member 1
TRIM22	TRIM22	tripartite motif containing 22
SSBP2	SSBP2	single-stranded DNA binding protein 2
PKN1	PKN1	protein kinase N1
CDIPT	CDIPT	CDP-diacylglycerol--inositol 3-phosphatidyltransferase
PPM1B	PPM1B	protein phosphatase, Mg2+/Mn2+ dependent, 1B
PDE6D	PDE6D	phosphodiesterase 6D, cGMP-specific, rod, delta
FRY	FRY	furry homolog (Drosophila)
CDC7	CDC7	cell division cycle 7 homolog (S. cerevisiae)
DACT1	DACT1	dapper, antagonist of beta-catenin, homolog 1 (Xenopus laevis)
RGS3	RGS3	regulator of G-protein signaling 3
COPS7B	COPS7B	COP9 constitutive photomorphogenic homolog subunit 7B (Arabidopsis)
FAR2	FAR2	fatty acyl CoA reductase 2
CPE	CPE	carboxypeptidase E
NPPC	NPPC	natriuretic peptide C
NARS2	NARS2	asparaginyl-tRNA synthetase 2, mitochondrial (putative)
KL	KL	klotho
MGMT	MGMT	O-6-methylguanine-DNA methyltransferase
SOX13	SOX13	SRY (sex determining region Y)-box 13
WWTR1	WWTR1	WW domain containing transcription regulator 1
PPP2R5C	PPP2R5C	protein phosphatase 2, regulatory subunit B', gamma
LMX1A	LMX1A	LIM homeobox transcription factor 1, alpha
ARFGAP3	ARFGAP3	ADP-ribosylation factor GTPase activating protein 3
ESR1	ESR1	estrogen receptor 1
ASPHD1	ASPHD1	aspartate beta-hydroxylase domain containing 1
ST6GAL2	ST6GAL2	ST6 beta-galactosamide alpha-2,6-sialyltranferase 2
organic substance metabolic process	GO:0071704
adjP=0.0082
LMO1	LMO1	LIM domain only 1 (rhombotin 1)
GAS7	GAS7	growth arrest-specific 7
TRIM5	TRIM5	tripartite motif containing 5
ESRP1	ESRP1	epithelial splicing regulatory protein 1
ZNF366	ZNF366	zinc finger protein 366
SCD5	SCD5	stearoyl-CoA desaturase 5
ETNK2	ETNK2	ethanolamine kinase 2
GIPC1	GIPC1	GIPC PDZ domain containing family, member 1
TRIM22	TRIM22	tripartite motif containing 22
SSBP2	SSBP2	single-stranded DNA binding protein 2
PKN1	PKN1	protein kinase N1
CDIPT	CDIPT	CDP-diacylglycerol--inositol 3-phosphatidyltransferase
PPM1B	PPM1B	protein phosphatase, Mg2+/Mn2+ dependent, 1B
PDE6D	PDE6D	phosphodiesterase 6D, cGMP-specific, rod, delta
FRY	FRY	furry homolog (Drosophila)
CDC7	CDC7	cell division cycle 7 homolog (S. cerevisiae)
DACT1	DACT1	dapper, antagonist of beta-catenin, homolog 1 (Xenopus laevis)
RGS3	RGS3	regulator of G-protein signaling 3
COPS7B	COPS7B	COP9 constitutive photomorphogenic homolog subunit 7B (Arabidopsis)
FAR2	FAR2	fatty acyl CoA reductase 2
CPE	CPE	carboxypeptidase E
NPPC	NPPC	natriuretic peptide C
NARS2	NARS2	asparaginyl-tRNA synthetase 2, mitochondrial (putative)
KL	KL	klotho
MGMT	MGMT	O-6-methylguanine-DNA methyltransferase
SOX13	SOX13	SRY (sex determining region Y)-box 13
WWTR1	WWTR1	WW domain containing transcription regulator 1
PPP2R5C	PPP2R5C	protein phosphatase 2, regulatory subunit B', gamma
LMX1A	LMX1A	LIM homeobox transcription factor 1, alpha
ARFGAP3	ARFGAP3	ADP-ribosylation factor GTPase activating protein 3
ESR1	ESR1	estrogen receptor 1
ASPHD1	ASPHD1	aspartate beta-hydroxylase domain containing 1
ST6GAL2	ST6GAL2	ST6 beta-galactosamide alpha-2,6-sialyltranferase 2
regulation of MAPK cascade	GO:0043408
adjP=0.0091
PKN1	PKN1	protein kinase N1
ESR1	ESR1	estrogen receptor 1
KL	KL	klotho
DACT1	DACT1	dapper, antagonist of beta-catenin, homolog 1 (Xenopus laevis)
RGS3	RGS3	regulator of G-protein signaling 3
metabolic process	GO:0008152
adjP=0.0093
LMO1	LMO1	LIM domain only 1 (rhombotin 1)
GAS7	GAS7	growth arrest-specific 7
TRIM5	TRIM5	tripartite motif containing 5
ESRP1	ESRP1	epithelial splicing regulatory protein 1
ZNF366	ZNF366	zinc finger protein 366
SCD5	SCD5	stearoyl-CoA desaturase 5
ETNK2	ETNK2	ethanolamine kinase 2
GIPC1	GIPC1	GIPC PDZ domain containing family, member 1
TRIM22	TRIM22	tripartite motif containing 22
SSBP2	SSBP2	single-stranded DNA binding protein 2
PKN1	PKN1	protein kinase N1
CDIPT	CDIPT	CDP-diacylglycerol--inositol 3-phosphatidyltransferase
PPM1B	PPM1B	protein phosphatase, Mg2+/Mn2+ dependent, 1B
PDE6D	PDE6D	phosphodiesterase 6D, cGMP-specific, rod, delta
FRY	FRY	furry homolog (Drosophila)
CDC7	CDC7	cell division cycle 7 homolog (S. cerevisiae)
DACT1	DACT1	dapper, antagonist of beta-catenin, homolog 1 (Xenopus laevis)
RGS3	RGS3	regulator of G-protein signaling 3
COPS7B	COPS7B	COP9 constitutive photomorphogenic homolog subunit 7B (Arabidopsis)
FAR2	FAR2	fatty acyl CoA reductase 2
CPE	CPE	carboxypeptidase E
NPPC	NPPC	natriuretic peptide C
NARS2	NARS2	asparaginyl-tRNA synthetase 2, mitochondrial (putative)
DSCAM	DSCAM	Down syndrome cell adhesion molecule
KL	KL	klotho
MGMT	MGMT	O-6-methylguanine-DNA methyltransferase
SOX13	SOX13	SRY (sex determining region Y)-box 13
WWTR1	WWTR1	WW domain containing transcription regulator 1
PPP2R5C	PPP2R5C	protein phosphatase 2, regulatory subunit B', gamma
LMX1A	LMX1A	LIM homeobox transcription factor 1, alpha
ARFGAP3	ARFGAP3	ADP-ribosylation factor GTPase activating protein 3
ESR1	ESR1	estrogen receptor 1
ASPHD1	ASPHD1	aspartate beta-hydroxylase domain containing 1
ST6GAL2	ST6GAL2	ST6 beta-galactosamide alpha-2,6-sialyltranferase 2
cell projection morphogenesis	GO:0048858
adjP=0.0117
LMX1A	LMX1A	LIM homeobox transcription factor 1, alpha
CNTN6	CNTN6	contactin 6
DSCAM	DSCAM	Down syndrome cell adhesion molecule
GAS7	GAS7	growth arrest-specific 7
DACT1	DACT1	dapper, antagonist of beta-catenin, homolog 1 (Xenopus laevis)
WWTR1	WWTR1	WW domain containing transcription regulator 1
cell part morphogenesis	GO:0032990
adjP=0.0127
LMX1A	LMX1A	LIM homeobox transcription factor 1, alpha
CNTN6	CNTN6	contactin 6
DSCAM	DSCAM	Down syndrome cell adhesion molecule
GAS7	GAS7	growth arrest-specific 7
DACT1	DACT1	dapper, antagonist of beta-catenin, homolog 1 (Xenopus laevis)
WWTR1	WWTR1	WW domain containing transcription regulator 1
regulation of catabolic process	GO:0009894
adjP=0.0128
ARFGAP3	ARFGAP3	ADP-ribosylation factor GTPase activating protein 3
GIPC1	GIPC1	GIPC PDZ domain containing family, member 1
PDE6D	PDE6D	phosphodiesterase 6D, cGMP-specific, rod, delta
DACT1	DACT1	dapper, antagonist of beta-catenin, homolog 1 (Xenopus laevis)
RGS3	RGS3	regulator of G-protein signaling 3
single-organism metabolic process	GO:0044710
adjP=0.0133
LMO1	LMO1	LIM domain only 1 (rhombotin 1)
GAS7	GAS7	growth arrest-specific 7
TRIM5	TRIM5	tripartite motif containing 5
ESRP1	ESRP1	epithelial splicing regulatory protein 1
ZNF366	ZNF366	zinc finger protein 366
SCD5	SCD5	stearoyl-CoA desaturase 5
ETNK2	ETNK2	ethanolamine kinase 2
GIPC1	GIPC1	GIPC PDZ domain containing family, member 1
TRIM22	TRIM22	tripartite motif containing 22
SSBP2	SSBP2	single-stranded DNA binding protein 2
PKN1	PKN1	protein kinase N1
CDIPT	CDIPT	CDP-diacylglycerol--inositol 3-phosphatidyltransferase
PPM1B	PPM1B	protein phosphatase, Mg2+/Mn2+ dependent, 1B
PDE6D	PDE6D	phosphodiesterase 6D, cGMP-specific, rod, delta
FRY	FRY	furry homolog (Drosophila)
CDC7	CDC7	cell division cycle 7 homolog (S. cerevisiae)
DACT1	DACT1	dapper, antagonist of beta-catenin, homolog 1 (Xenopus laevis)
RGS3	RGS3	regulator of G-protein signaling 3
COPS7B	COPS7B	COP9 constitutive photomorphogenic homolog subunit 7B (Arabidopsis)
FAR2	FAR2	fatty acyl CoA reductase 2
CPE	CPE	carboxypeptidase E
NPPC	NPPC	natriuretic peptide C
NARS2	NARS2	asparaginyl-tRNA synthetase 2, mitochondrial (putative)
KL	KL	klotho
MGMT	MGMT	O-6-methylguanine-DNA methyltransferase
SOX13	SOX13	SRY (sex determining region Y)-box 13
WWTR1	WWTR1	WW domain containing transcription regulator 1
PPP2R5C	PPP2R5C	protein phosphatase 2, regulatory subunit B', gamma
LMX1A	LMX1A	LIM homeobox transcription factor 1, alpha
ARFGAP3	ARFGAP3	ADP-ribosylation factor GTPase activating protein 3
ESR1	ESR1	estrogen receptor 1
ASPHD1	ASPHD1	aspartate beta-hydroxylase domain containing 1
ST6GAL2	ST6GAL2	ST6 beta-galactosamide alpha-2,6-sialyltranferase 2
regulation of cellular process	GO:0050794
adjP=0.0155
DSCAM	DSCAM	Down syndrome cell adhesion molecule
LMO1	LMO1	LIM domain only 1 (rhombotin 1)
GAS7	GAS7	growth arrest-specific 7
ESRP1	ESRP1	epithelial splicing regulatory protein 1
ZNF366	ZNF366	zinc finger protein 366
GIPC1	GIPC1	GIPC PDZ domain containing family, member 1
SSBP2	SSBP2	single-stranded DNA binding protein 2
TRIM22	TRIM22	tripartite motif containing 22
NETO1	NETO1	neuropilin (NRP) and tolloid (TLL)-like 1
PKN1	PKN1	protein kinase N1
KL	KL	klotho
PPM1B	PPM1B	protein phosphatase, Mg2+/Mn2+ dependent, 1B
MGMT	MGMT	O-6-methylguanine-DNA methyltransferase
CNTN6	CNTN6	contactin 6
PDE6D	PDE6D	phosphodiesterase 6D, cGMP-specific, rod, delta
FRY	FRY	furry homolog (Drosophila)
MPP7	MPP7	membrane protein, palmitoylated 7 (MAGUK p55 subfamily member 7)
RGS3	RGS3	regulator of G-protein signaling 3
DACT1	DACT1	dapper, antagonist of beta-catenin, homolog 1 (Xenopus laevis)
CDC7	CDC7	cell division cycle 7 homolog (S. cerevisiae)
WWTR1	WWTR1	WW domain containing transcription regulator 1
ARFGAP3	ARFGAP3	ADP-ribosylation factor GTPase activating protein 3
LMX1A	LMX1A	LIM homeobox transcription factor 1, alpha
PPP2R5C	PPP2R5C	protein phosphatase 2, regulatory subunit B', gamma
STIM2	STIM2	stromal interaction molecule 2
ESR1	ESR1	estrogen receptor 1
CPE	CPE	carboxypeptidase E
NPPC	NPPC	natriuretic peptide C
PTGER1	PTGER1	prostaglandin E receptor 1 (subtype EP1), 42kDa
