# Supplementary material for: The genomic landscape of human cellular circadian variation points to a novel role for the signalosome
Source: eLife. 2017 Sep 4;6:e24994. doi: 10.7554/eLife.24994 (PMC5601996; doi:10.7554/eLife.24994)
Supplement: Figure 3—source data 2. — Significantly associated genes, as well as all genes in the pathway not significantly associated, can be perused via the ‘view detail’ links for each pathway. [file elife-24994-fig3-data2.xlsx]

## Sheet: Sheet1
Pathway Name	p-value	FDR	Genes/Total		Gene Names & Details
CELLULAR PROTEIN CATABOLIC PROCESS	< 0.001	0	5/58
				NPLOC4, UBE2E1, UBE2G2, PARK2, SQSTM1
	< 0.001	0.00166667	6/69	View Detail
PROTEIN CATABOLIC PROCESS
				NPLOC4, UBE2E1, UBE2G2, PARK2, FAF1, SQSTM1
	< 0.001	0.0025	6/104	View Detail
CELLULAR MACROMOLECULE CATABOLIC PROCESS
				NPLOC4, UBE2E1, UBE2G2, PARK2, GNPDA1, SQSTM1
	< 0.001	0.00975	8/117	View Detail
BIOPOLYMER CATABOLIC PROCESS
				NPLOC4, UBE2E1, UBE2G2, PARK2, FAF1, FOXL2, BNIP3, SQSTM1
	0.001	0.0293333	8/57	View Detail
HEDGEHOG SIGNALING PATHWAY
				WNT4, LRP2, BMP7, CSNK1A1, WNT2B, WNT5A, CSNK1A1L, FBXW11
	< 0.001	0.0324286	9/137	View Detail
MACROMOLECULE CATABOLIC PROCESS
				NPLOC4, UBE2E1, UBE2G2, PARK2, FAF1, FOXL2, GNPDA1, BNIP3, SQSTM1
	0.002	0.0334	17/161	View Detail
SOLUBLE FRACTION
				KL, EDN3, STAC, PDE4B, EDN1, DIE, WNT5A, ANXA2, TEP1, TNFSF10, ABI1, TARS, STX2, MLN, RAB3GAP1, WIP3, FSHB
	< 0.001	0.0558	7/43	View Detail
BLOOD COAGULATION
				F13A1, F2RL2, CD36, VWF, F10, ITGA2, L3MBTL4
	< 0.001	0.0558	7/44	View Detail
COAGULATION
				F13A1, F2RL2, CD36, VWF, F10, ITGA2, L3MBTL4
	< 0.001	0.0558	7/48	View Detail
HEMOSTASIS
				F13A1, F2RL2, CD36, VWF, F10, ITGA2, L3MBTL4
	0.003	0.0783636	5/38	View Detail
OXIDOREDUCTASE ACTIVITY
				CYP26A1, SC5DL, P4HA2, PTGS1, KMO
	0.001	0.0813333	8/57	View Detail
REGULATION OF BODY FLUID LEVELS
				F13A1, F2RL2, CD36, VWF, F10, ITGA2, L3MBTL4, SLC22A2
	0.002	0.115733	6/27	View Detail
G1 S TRANSITION OF MITOTIC CELL CYCLE
				CDC7, CUL1, GFI1, LATS2, CUL4A, CUL2
	0.004	0.120286	8/100	View Detail
GOLGI APPARATUS PART
				RAB30, HS3ST1, LARGE, CHST2, SPG21, BNIP3, AP1GBP1, NBEA
	0.002	0.126692	26/191	View Detail
PROTEOLYSIS
				NPLOC4, ADAMTS9, UBE2E1, UBE2G2, PARK2, BACE2, CPA3, PITRM1, CTSG, MMP20, MYH9, XPNPEP1, TPP2, PCSK2, ATG4C, SRGN, CTSH, PCSK6, MBTPS1, DIE, MMP2, MBL2, PCSK5, CORIN, SQSTM1, CTRC
	0.001	0.127812	16/152	View Detail
TRANSCRIPTION REPRESSOR ACTIVITY
				TRIM22, ID4, REST, HDAC9, ZNF136, HDAC4, NCOR2, ZBTB16, ZNF423, KLF12, NR1D1, MSC, RFX3, CREG1, RYBP, ID2
	0.005	0.237588	6/68	View Detail
LIGASE ACTIVITY FORMING CARBON NITROGEN BONDS
				UBE2E1, PARK2, MTHFD1, CPS1, GCLC, HLCS
				View Detail
