# Supplementary material for: The genomic landscape of human cellular circadian variation points to a novel role for the signalosome
Source: eLife. 2017 Sep 4;6:e24994. doi: 10.7554/eLife.24994 (PMC5601996; doi:10.7554/eLife.24994)
Supplement: Supplementary file 1. [file elife-24994-supp1.xls]

## Sheet: Table1
Spearman correlation between all phenotypes (rho|p-value). P-values smaller than 0.05 are highlighted in blue
	amplitude	period	phase	per1	per2
amplitude	1|0e+00	-0.21|9.43e-03	-0.14|7.53e-02	-0.056|4.95e-01	0.078|3.37e-01
period		1|0e+00	0.48|1.48e-10	-0.13|1e-01	-0.071|3.81e-01
phase			1|0e+00	-0.063|4.42e-01	-0.096|2.39e-01
per1				1|0e+00	0.18|2.43e-02
per2					1|0e+00
