# Supplementary material for: The genomic landscape of human cellular circadian variation points to a novel role for the signalosome
Source: eLife. 2017 Sep 4;6:e24994. doi: 10.7554/eLife.24994 (PMC5601996; doi:10.7554/eLife.24994)
Supplement: Supplementary file 2. — Right columns, unadjusted p-values and –logP values. [file elife-24994-supp2.xls]

## Sheet: Table1
Gene	Description	SNP	P-value	-logP
COPS7B	COP9 signalosome subunit 7B	rs920400	1.07e-07	6.97062
PDE6D	Phosphodiesterase 6D	rs920400	1.07e-07	6.97062
DACT1	Dishevelled binding antagonist of beta catenin 1	rs422683	1.07e-07	6.97062
NPPC	natriuretic peptide C	rs13397384	3.15e-07	6.50169
ESRP1	Epithelial splicing regulatory protein 1	rs6471454	2.46e-06	5.60906
LMX1A	LIM homeobox transcription factor 1 alpha	rs10918142	4.05e-06	5.39254
LOC653739	uncharacterized	rs11761570	4.1e-06	5.38722
PKN1	Protein kinase N1	rs28364035	4.79e-06	5.31966
PTGER1	Prostaglandin E receptor 1	rs28364035	4.79e-06	5.31966
GIPC1	GIPC PDZ domain containing family member 1	rs28364035	4.79e-06	5.31966
WWTR1	WW domain containing transcription regulator 1	rs722420	4.85e-06	5.31426
NARS2	Asparaginyl-tRNA synthetase 2, mitochondrial (putative)	rs7928933	5e-06	5.30103
ADAMTS9-AS2	ADAMTS9 antisense RNA 2	rs76244934	5.12e-06	5.29073
KL	Klotho	rs17517282	5.33e-06	5.27327
LINC00423	Long intergenic non-protein coding RNA 423	rs17517282	5.33e-06	5.27327
PPP2R5C	Protein phosphatase 2 regulatory subunit B,gamma	kgp3105015	5.46e-06	5.26281
CDC7	Cell division cycle 7	rs3851269	6.11e-06	5.21396
FRY	FRY microtubule binding protein	kgp4424737	8.01e-06	5.09637
FAM221A	Family with sequence similarity 221 member A	rs17779517	8.54e-06	5.06854
MIR548A2	MicroRNA 548a-2	rs10510919	9.21e-06	5.03574
BC029835	n/a	rs17561832	9.3e-06	5.03152
LINC01467	long intergenic non-protein coding RNA 1467	rs17561832	9.3e-06	5.03152
ESR1	Estrogen receptor 1	rs4546453	9.37e-06	5.02826
KCNE4	Potassium voltage-gated channel subfamily E regulatory subunit 4	rs1550423	9.89e-06	5.0048
ARMC4	Armadillo repeat containing 4	rs72801826	9.9e-06	5.00436
MPP7	Membrane palmitoylated protein 7	rs72801826	9.9e-06	5.00436
LOC100505797	myosin heavy chain IB-like	kgp11034086	1.04e-05	4.98297
TRIM5	Tripartite motif containing 5	rs11038872	1.06e-05	4.97469
TRIM22	Tripartite motif containing 22	rs11038872	1.06e-05	4.97469
E4BP41L2	n/a	rs12662005	1.06e-05	4.97469
SHISA6	Shisa family member 6	rs11870383	1.07e-05	4.97062
SSBP2	single stranded DNA binding protein 2	rs2047734	1.09e-05	4.96257
HFM1	HFM1, ATP dependent DNA helicase homolog	rs148487252	1.22e-05	4.91364
DSCAM	DS cell adhesion molecule	kgp2356019	1.26e-05	4.89963
ST6GAL2	ST6 beta-galactoside alpha-2,6-sialyltransferase 2	rs6729112	1.39e-05	4.85699
ARFGAP3	ADP ribosylation factor GTPase activating protein 3	rs4822197	1.42e-05	4.84771
LMO1	LIM domain only 1	rs2290450	1.44e-05	4.84164
CPE	Carboxypeptidase E	rs4690815	1.49e-05	4.82681
MIR578	MicroRNA 578	rs4690815	1.49e-05	4.82681
STOX2	Storkhead box 2	kgp12389782	1.49e-05	4.82681
RGS3	regulator of G-protein signaling 3	rs10981830	1.58e-05	4.80134
STIM2	stromal interaction molecule 2	rs6822764	1.63e-05	4.78781
SPACA7	Sperm acrosome associated 7	rs7328026	1.64e-05	4.78516
NETO1	Neuropilin and tolloid like 1	rs28479302	1.65e-05	4.78252
C7orf49	Chromosome 7 open reading frame 49	rs10241991	1.74e-05	4.75945
ZNF366	zinc finger protein 366	kgp5478310	1.75e-05	4.75696
SOX13	SRY-box 13	rs56005111	1.76e-05	4.75449
ETNK2	Ethanolamine kinase 2	rs56005111	1.76e-05	4.75449
MGMT	O-6-methylguanine-DNA methyltransferase	kgp4613661	1.79e-05	4.74715
SLC34A2	Solute carrier family 34 member 2	rs3796777	1.81e-05	4.74232
BOLA2	bolA family member 2	rs8047140	1.85e-05	4.73283
CDIPT	CDP-diacylglycerol--inositol 3-phosphatidyltransferase	rs8047140	1.85e-05	4.73283
ASPHD1	aspartate beta-hydroxylase domain containing 1	rs8047140	1.85e-05	4.73283
CNTN6	Contactin 6	rs1499118	1.85e-05	4.73283
GAS7	Growth arrest specific 7	kgp4208840	1.89e-05	4.72354
CSMD1	CUB and Sushi multiple domains 1	kgp453731	1.91e-05	4.71897
PLXDC2	Plexin domain containing 2	rs11591599	1.92e-05	4.7167
PPM1B	Protein Phosphatase, Mg2+/Mn2+ Dependent 1B	rs4953137	1.9691e-05	4.70573
FAR2	Fatty acyl-CoA reductase 2	rs7976184	2.13e-05	4.67162
SCD5	Stearoyl-CoA desaturase 5	rs10030631	2.22e-05	4.65365
