# Supplementary material for: The genomic landscape of human cellular circadian variation points to a novel role for the signalosome
Source: eLife. 2017 Sep 4;6:e24994. doi: 10.7554/eLife.24994 (PMC5601996; doi:10.7554/eLife.24994)
Supplement: Supplementary file 3. — Middle columns, unadjusted p-values and –logP values. Right column, lowest-level GO term associated with each pathway. [file elife-24994-supp3.xls]

## Sheet: Table3
Gene	Description	SNP	P-value	-logP	Pathway
COPS7B	COP9 signalosome subunit 7B [Source:HGNC Symbol;Acc:HGNC:16760]	rs920400	1.07e-07	6.97062	PROTEIN DENEDDYLATION
PTGER1	prostaglandin E receptor 1 [Source:HGNC Symbol;Acc:HGNC:9593]	rs28364035	4.78613e-06	5.32002	NEUROACTIVE_LIGAND_RECEPTOR_INTERACTION
NPLOC4	NPL4 homolog, ubiquitin recognition factor [Source:HGNC Symbol;Acc:HGNC:18261]	rs7503894	5.94463e-06	5.22588	CELLULAR_CATABOLIC_PROCESS
TSPAN10	Tetraspanin 10	rs7503894	5.94463e-06	5.22588	MEMBRANE
CDC7	cell division cycle 7 [Source:HGNC Symbol;Acc:HGNC:1745]	rs963910	1.03387e-05	4.98553	INTERPHASE_OF_MITOTIC_CELL_CYCLE
TRIM22	tripartite motif containing 22 [Source:HGNC Symbol;Acc:HGNC:16379]	rs11038872	1.0632e-05	4.97339	TRANSCRIPTION_REPRESSOR_ACTIVITY
GRM7	glutamate metabotropic receptor 7 [Source:HGNC Symbol;Acc:HGNC:4599]	rs1516302	1.15883e-05	4.93598	NEUROACTIVE_LIGAND_RECEPTOR_INTERACTION
PARD3	par-3 family cell polarity regulator [Source:HGNC Symbol;Acc:HGNC:16051]	rs647768	1.26792e-05	4.89691	NEUROACTIVE_LIGAND_RECEPTOR_INTERACTION
UBE2E1	ubiquitin conjugating enzyme E2 E1 [Source:HGNC Symbol;Acc:HGNC:12477]	rs9867568	2.23449e-05	4.65082	CELLULAR_MACROMOLECULE_CATABOLIC_PROCESS
CD209	CD209 molecule [Source:HGNC Symbol;Acc:HGNC:1641]	rs73493937	2.44005e-05	4.6126	SUGAR_BINDING
ID4	inhibitor of DNA binding 4, HLH protein [Source:HGNC Symbol;Acc:HGNC:5363]	rs2328423	2.68871e-05	4.57046	TRANSCRIPTION_REPRESSOR_ACTIVITY
RAB30	RAB30, member RAS oncogene family [Source:HGNC Symbol;Acc:HGNC:9770]	rs11601610	2.89328e-05	4.53861	GOLGI_APPARATUS_PART
REST	RE1 silencing transcription factor [Source:HGNC Symbol;Acc:HGNC:9966]	rs899631	2.99581e-05	4.52349	TRANSCRIPTION_REPRESSOR_ACTIVITY
UBE2G2	ubiquitin conjugating enzyme E2 G2 [Source:HGNC Symbol;Acc:HGNC:12483]	rs2294158	3.00256e-05	4.52251	CELLULAR_MACROMOLECULE_CATABOLIC_PROCESS
PARK2	parkin RBR E3 ubiquitin protein ligase [Source:HGNC Symbol;Acc:HGNC:8607]	rs9365332	3.04485e-05	4.51643	CELLULAR_MACROMOLECULE_CATABOLIC_PROCESS
GRID2	glutamate ionotropic receptor delta type subunit 2 [Source:HGNC Symbol;Acc:HGNC:4576]	rs8180202	3.21995e-05	4.49215	NEUROACTIVE_LIGAND_RECEPTOR_INTERACTION
F13A1	coagulation factor XIII A chain [Source:HGNC Symbol;Acc:HGNC:3531]	rs9328354	3.23158e-05	4.49059	BLOOD_COAGULATION
HRH4	histamine receptor H4 [Source:HGNC Symbol;Acc:HGNC:17383]	rs72876245	3.66272e-05	4.4362	NEUROACTIVE_LIGAND_RECEPTOR_INTERACTION
HS3ST1	heparan sulfate-glucosamine 3-sulfotransferase 1 [Source:HGNC Symbol;Acc:HGNC:5194]	rs6858478	3.75865e-05	4.42497	GOLGI_APPARATUS_PART
HDAC9	histone deacetylase 9 [Source:HGNC Symbol;Acc:HGNC:14065]	rs13229874	3.95708e-05	4.40262	TRANSCRIPTION_REPRESSOR_ACTIVITY
WNT4	Wnt family member 4 [Source:HGNC Symbol;Acc:HGNC:12783]	rs7543136	4.05361e-05	4.39216	HSA04340_HEDGEHOG_SIGNALING_PATHWAY
CYP26A1	cytochrome P450 family 26 subfamily A member 1 [Source:HGNC Symbol;Acc:HGNC:2603]	rs11187287	4.10342e-05	4.38685	OXIDOREDUCTASE_ACTIVITY
CLEC10A	C-type lectin domain family 10 member A [Source:HGNC Symbol;Acc:HGNC:16916]	rs11654772	4.21382e-05	4.37532	SUGAR_BINDING
SC5DL	Sterol-C5-Desaturase	rs6589872	4.27336e-05	4.36923	OXIDOREDUCTASE_ACTIVITY
CUL1	cullin 1 [Source:HGNC Symbol;Acc:HGNC:2551]	rs11536507	4.57917e-05	4.33921	INTERPHASE_OF_MITOTIC_CELL_CYCLE
LRP2	LDL receptor related protein 2 [Source:HGNC Symbol;Acc:HGNC:6694]	rs831012	4.67577e-05	4.33015	HSA04340_HEDGEHOG_SIGNALING_PATHWAY
F2RL2	coagulation factor II thrombin receptor like 2 [Source:HGNC Symbol;Acc:HGNC:3539]	rs2069685	4.82169e-05	4.3168	NEUROACTIVE_LIGAND_RECEPTOR_INTERACTION
CNTN4	contactin 4 [Source:HGNC Symbol;Acc:HGNC:2174]	rs2648693	4.87294e-05	4.31221	CELL_RECOGNITION
NTSR2	neurotensin receptor 2 [Source:HGNC Symbol;Acc:HGNC:8040]	rs2304400	4.92233e-05	4.30783	NEUROACTIVE_LIGAND_RECEPTOR_INTERACTION
CD36	CD36 molecule [Source:HGNC Symbol;Acc:HGNC:1663]	rs10224403	5.69974e-05	4.24414	BLOOD_COAGULATION
MTHFD1	methylenetetrahydrofolate dehydrogenase, cyclohydrolase and formyltetrahydrofolate synthetase 1 [Source:HGNC Symbol;Acc:HGNC:7432]	rs3783727	6.90795e-05	4.16065	LIGASE_ACTIVITY__FORMING_CARBON_NITROGEN_BONDS
FSHR	follicle stimulating hormone receptor [Source:HGNC Symbol;Acc:HGNC:3969]	rs17037869	7.37911e-05	4.132	REGULATION OF PROTEIN PHOSPHORYLATION
LARGE1	Xylosyl- And Glucuronyltransferase 1	rs56757768	8.68772e-05	4.06109	GOLGI_APPARATUS_PART
FAF1	Fas associated factor 1 [Source:HGNC Symbol;Acc:HGNC:3578]	rs3789585	8.69024e-05	4.06097	PROTEIN_CATABOLIC_PROCESS
LIG4	DNA ligase 4 [Source:HGNC Symbol;Acc:HGNC:6601]	rs12870098	8.78209e-05	4.0564	LIGASE_ACTIVITY
ADRA1B	adrenoceptor alpha 1B [Source:HGNC Symbol;Acc:HGNC:278]	rs31685	9.78832e-05	4.00929	HSA04080_NEUROACTIVE_LIGAND_RECEPTOR_INTERACTION
SLIT2	slit guidance ligand 2 [Source:HGNC Symbol;Acc:HGNC:11086]	rs1902844	0.000102356	3.98989	CELL_RECOGNITION
TRHR	thyrotropin releasing hormone receptor [Source:HGNC Symbol;Acc:HGNC:12299]	rs7465417	0.000104156	3.98232	SIGNAL TRANSDUCTION
PRL	prolactin [Source:HGNC Symbol;Acc:HGNC:9445]	rs10456254	0.000107683	3.96785	CELLULAR_CATABOLIC_PROCESS
ZNF136	zinc finger protein 136 [Source:HGNC Symbol;Acc:HGNC:12920]	rs166601	0.000110099	3.95822	TRANSCRIPTION_REPRESSOR_ACTIVITY
BMP7	bone morphogenetic protein 7 [Source:HGNC Symbol;Acc:HGNC:1074]	rs6070014	0.000110216	3.95776	HSA04340_HEDGEHOG_SIGNALING_PATHWAY
LGALS8	galectin 8 [Source:HGNC Symbol;Acc:HGNC:6569]	rs10802542	0.000113167	3.94628	SUGAR_BINDING
GRIK2	glutamate ionotropic receptor kainate type subunit 2 [Source:HGNC Symbol;Acc:HGNC:4580]	rs1338166	0.00012132	3.91607	ION TRANSPORT
CSNK1A1	casein kinase 1 alpha 1 [Source:HGNC Symbol;Acc:HGNC:2451]	rs10045427	0.000123081	3.90981	HSA04340_HEDGEHOG_SIGNALING_PATHWAY
GFI1	growth factor independent 1 transcriptional repressor [Source:HGNC Symbol;Acc:HGNC:4237]	rs11582379	0.000123705	3.90761	INTERPHASE_OF_MITOTIC_CELL_CYCLE
MYO16	myosin XVI [Source:HGNC Symbol;Acc:HGNC:29822]	rs1887122	0.000130067	3.88583	INTERPHASE_OF_MITOTIC_CELL_CYCLE
BACE2	beta-site APP-cleaving enzyme 2 [Source:HGNC Symbol;Acc:HGNC:934]	rs2837997	0.00014364	3.84272	PROTEOLYSIS
NCOR2	nuclear receptor corepressor 2 [Source:HGNC Symbol;Acc:HGNC:7673]	rs4765582	0.000147374	3.83158	TRANSCRIPTION_REPRESSOR_ACTIVITY
ZBTB16	zinc finger and BTB domain containing 16 [Source:HGNC Symbol;Acc:HGNC:12930]	rs763857	0.000156077	3.80666	TRANSCRIPTION_REPRESSOR_ACTIVITY
ADRA2A	adrenoceptor alpha 2A [Source:HGNC Symbol;Acc:HGNC:281]	rs945335	0.00015749	3.80275	HSA04080_NEUROACTIVE_LIGAND_RECEPTOR_INTERACTION
CPA3	carboxypeptidase A3 [Source:HGNC Symbol;Acc:HGNC:2298]	rs9289775	0.000159214	3.79802	PROTEOLYSIS
HTR5A	5-hydroxytryptamine receptor 5A [Source:HGNC Symbol;Acc:HGNC:5300]	rs2698497	0.000170255	3.7689	SIGNAL TRANSDUCTION
ZNF423	zinc finger protein 423 [Source:HGNC Symbol;Acc:HGNC:16762]	rs2241257	0.000172124	3.76416	TRANSCRIPTION_REPRESSOR_ACTIVITY
FOXL2	forkhead box L2 [Source:HGNC Symbol;Acc:HGNC:1092]	rs9846784	0.000199541	3.69997	BIOPOLYMER_CATABOLIC_PROCESS
PITRM1	pitrilysin metallopeptidase 1 [Source:HGNC Symbol;Acc:HGNC:17663]	rs3740609	0.000203027	3.69245	PROTEOLYSIS
LATS2	large tumor suppressor kinase 2 [Source:HGNC Symbol;Acc:HGNC:6515]	rs655034	0.000204662	3.68896	G1_S_TRANSITION_OF_MITOTIC_CELL_CYCLE
CADM1	cell adhesion molecule 1 [Source:HGNC Symbol;Acc:HGNC:5951]	rs11215622	0.000206768	3.68452	CELL_RECOGNITION
CTSG	cathepsin G [Source:HGNC Symbol;Acc:HGNC:2532]	rs72679396	0.000207378	3.68324	PROTEOLYSIS
GABRB2	gamma-aminobutyric acid type A receptor beta2 subunit [Source:HGNC Symbol;Acc:HGNC:4082]	rs1995375	0.000209396	3.67903	GAMMA-AMINOBUTYRIC ACID SIGNALING PATHWAY
MMP20	matrix metallopeptidase 20 [Source:HGNC Symbol;Acc:HGNC:7167]	rs2701977	0.000216189	3.66517	PROTEOLYSIS
MYH9	myosin heavy chain 9 [Source:HGNC Symbol;Acc:HGNC:7579]	rs1005570	0.00021634	3.66486	PROTEOLYSIS
TPP2	tripeptidyl peptidase 2 [Source:HGNC Symbol;Acc:HGNC:12016]	rs17591502	0.000236916	3.62541	PROTEOLYSIS
NPY1R	neuropeptide Y receptor Y1 [Source:HGNC Symbol;Acc:HGNC:7956]	rs4518199	0.000237376	3.62456	NEUROACTIVE_LIGAND_RECEPTOR_INTERACTION
VWF	von Willebrand factor [Source:HGNC Symbol;Acc:HGNC:12726]	rs3759320	0.000237889	3.62363	BLOOD_COAGULATION
PCSK2	proprotein convertase subtilisin/kexin type 2 [Source:HGNC Symbol;Acc:HGNC:8744]	rs16999097	0.000247573	3.6063	PROTEOLYSIS
GRIN2B	glutamate ionotropic receptor NMDA type subunit 2B [Source:HGNC Symbol;Acc:HGNC:4586]	rs7134097	0.000252246	3.59818	SIGNAL TRANSDUCTION
GLRA3	glycine receptor alpha 3 [Source:HGNC Symbol;Acc:HGNC:4328]	rs6825918	0.000258022	3.58834	TRANSPORT
GRM4	glutamate metabotropic receptor 4 [Source:HGNC Symbol;Acc:HGNC:4596]	rs12211633	0.000259342	3.58613	SIGNAL TRANSDUCTION
CUL4A	cullin 4A [Source:HGNC Symbol;Acc:HGNC:2554]	rs61967893	0.000275807	3.55939	G1_S_TRANSITION_OF_MITOTIC_CELL_CYCLE
F10	coagulation factor X [Source:HGNC Symbol;Acc:HGNC:3528]	rs3211744	0.000287693	3.54107	BLOOD_COAGULATION
AKR1D1	aldo-keto reductase family 1 member D1 [Source:HGNC Symbol;Acc:HGNC:388]	rs2450847	0.000295171	3.52993	CELLULAR_CATABOLIC_PROCESS
CDC42	cell division cycle 42 [Source:HGNC Symbol;Acc:HGNC:1736]	rs2501256	0.000299207	3.52403	SIG_PIP3_SIGNALING_IN_CARDIAC_MYOCTES
TSHR	thyroid stimulating hormone receptor [Source:HGNC Symbol;Acc:HGNC:12373]	rs2284735	0.000303247	3.5182	SIGNAL TRANSDUCTION
SRGN	serglycin [Source:HGNC Symbol;Acc:HGNC:9361]	rs2855020	0.000304966	3.51575	PROTEOLYSIS
OLA1	Obg like ATPase 1 [Source:HGNC Symbol;Acc:HGNC:28833]	rs62172840	0.00031183	3.50608	CELLULAR_CATABOLIC_PROCESS
WNT2B	Wnt family member 2B [Source:HGNC Symbol;Acc:HGNC:12781]	rs6668533	0.000315129	3.50151	HSA04340_HEDGEHOG_SIGNALING_PATHWAY
ITGA2	integrin subunit alpha 2 [Source:HGNC Symbol;Acc:HGNC:6137]	rs3212641	0.00032552	3.48742	BLOOD_COAGULATION
CNR1	cannabinoid receptor 1 [Source:HGNC Symbol;Acc:HGNC:2159]	rs7771020	0.000330399	3.48096	HSA04080_NEUROACTIVE_LIGAND_RECEPTOR_INTERACTION
PPARA	peroxisome proliferator activated receptor alpha [Source:HGNC Symbol;Acc:HGNC:9232]	rs135538	0.000331138	3.47999	CELLULAR_CATABOLIC_PROCESS
KLF12	Kruppel like factor 12 [Source:HGNC Symbol;Acc:HGNC:6346]	rs9543516	0.000332121	3.4787	TRANSCRIPTION_REPRESSOR_ACTIVITY
GNPDA1	glucosamine-6-phosphate deaminase 1 [Source:HGNC Symbol;Acc:HGNC:4417]	rs153147	0.000348168	3.45821	CELLULAR_MACROMOLECULE_CATABOLIC_PROCESS
NR1D1	nuclear receptor subfamily 1 group D member 1 [Source:HGNC Symbol;Acc:HGNC:7962]	rs2071427	0.000373513	3.42769	TRANSCRIPTION_REPRESSOR_ACTIVITY
CTSH	cathepsin H [Source:HGNC Symbol;Acc:HGNC:2535]	rs12148472	0.000374804	3.4262	PROTEOLYSIS
PCSK6	proprotein convertase subtilisin/kexin type 6 [Source:HGNC Symbol;Acc:HGNC:8569]	rs10152229	0.000376099	3.4247	PROTEOLYSIS
MC5R	melanocortin 5 receptor [Source:HGNC Symbol;Acc:HGNC:6933]	rs9955424	0.000390314	3.40859	SIGNAL TRANSDUCTION
MSC	musculin [Source:HGNC Symbol;Acc:HGNC:7321]	rs11779798	0.000394876	3.40354	TRANSCRIPTION_REPRESSOR_ACTIVITY
CLEC4M	C-type lectin domain family 4 member M [Source:HGNC Symbol;Acc:HGNC:13523]	rs10421948	0.000397846	3.40028	CELL_RECOGNITION
MBTPS1	membrane bound transcription factor peptidase, site 1 [Source:HGNC Symbol;Acc:HGNC:15456]	rs8057673	0.00040299	3.39471	PROTEOLYSIS
IDE	insulin degrading enzyme [Source:HGNC Symbol;Acc:HGNC:5381]	rs59697343	0.000403569	3.39408	PROTEOLYSIS
P4HA2	prolyl 4-hydroxylase subunit alpha 2 [Source:HGNC Symbol;Acc:HGNC:8547]	rs10520127	0.000421674	3.37502	OXIDOREDUCTASE_ACTIVITY
HTR2A	5-hydroxytryptamine receptor 2A [Source:HGNC Symbol;Acc:HGNC:5293]	rs9534510	0.000430301	3.36623	SIGNAL TRANSDUCTION
MMP2	matrix metallopeptidase 2 [Source:HGNC Symbol;Acc:HGNC:7166]	rs837528	0.000434326	3.36218	PROTEOLYSIS
GHRHR	growth hormone releasing hormone receptor [Source:HGNC Symbol;Acc:HGNC:4266]	rs73686073	0.000443669	3.35294	SIGNAL TRANSDUCTION
L3MBTL4	l(3)mbt-like 4 (Drosophila) [Source:HGNC Symbol;Acc:HGNC:26677]	rs1020046	0.000444505	3.35212	BLOOD_COAGULATION
LATS1	large tumor suppressor kinase 1 [Source:HGNC Symbol;Acc:HGNC:6514]	rs12195866	0.00046575	3.33185	INTERPHASE_OF_MITOTIC_CELL_CYCLE
PTH2R	parathyroid hormone 2 receptor [Source:HGNC Symbol;Acc:HGNC:9609]	rs7557376	0.000468041	3.32972	SIGNAL TRANSDUCTION
ADRA1A	adrenoceptor alpha 1A [Source:HGNC Symbol;Acc:HGNC:277]	rs1036812	0.000473209	3.32495	HSA04080_NEUROACTIVE_LIGAND_RECEPTOR_INTERACTION
RFX3	regulatory factor X3 [Source:HGNC Symbol;Acc:HGNC:9984]	rs12004573	0.000474778	3.32351	TRANSCRIPTION_REPRESSOR_ACTIVITY
MBL2	mannose binding lectin 2 [Source:HGNC Symbol;Acc:HGNC:6922]	rs16933062	0.000486245	3.31315	PROTEOLYSIS
CHST2	carbohydrate sulfotransferase 2 [Source:HGNC Symbol;Acc:HGNC:1970]	rs72998456	0.000487128	3.31236	GOLGI_APPARATUS_PART
BCKDHB	branched chain keto acid dehydrogenase E1 subunit beta [Source:HGNC Symbol;Acc:HGNC:987]	rs585142	0.000489405	3.31033	CELLULAR_CATABOLIC_PROCESS
CREB5	cAMP responsive element binding protein 5 [Source:HGNC Symbol;Acc:HGNC:16844]	rs42704	0.000489943	3.30985	SIG_PIP3_SIGNALING_IN_CARDIAC_MYOCTES
PCSK5	proprotein convertase subtilisin/kexin type 5 [Source:HGNC Symbol;Acc:HGNC:8747]	rs12236539	0.000497621	3.3031	PROTEOLYSIS
SPG21	spastic paraplegia 21 (autosomal recessive, Mast syndrome) [Source:HGNC Symbol;Acc:HGNC:20373]	rs7168348	0.000511435	3.29121	GOLGI_APPARATUS_PART
FAH	fumarylacetoacetate hydrolase [Source:HGNC Symbol;Acc:HGNC:3579]	rs71399407	0.000524812	3.28	CELLULAR_CATABOLIC_PROCESS
RTCA	RNA 3'-Terminal Phosphate Cyclase	rs11807256	0.000526702	3.27843	RNA PROCESSING
CORIN	corin, serine peptidase [Source:HGNC Symbol;Acc:HGNC:19012]	rs17572227	0.000545188	3.26345	PROTEOLYSIS
GCLC	glutamate-cysteine ligase catalytic subunit [Source:HGNC Symbol;Acc:HGNC:4311]	rs2066511	0.000561556	3.25061	LIGASE_ACTIVITY__FORMING_CARBON_NITROGEN_BONDS
HLCS	holocarboxylase synthetase [Source:HGNC Symbol;Acc:HGNC:4976]	rs14407	0.000568746	3.24508	LIGASE_ACTIVITY__FORMING_CARBON_NITROGEN_BONDS
GABRG3	gamma-aminobutyric acid type A receptor gamma3 subunit [Source:HGNC Symbol;Acc:HGNC:4088]	rs11632017	0.00056962	3.24441	GAMMA-AMINOBUTYRIC ACID SIGNALING PATHWAY
BNIP3	BCL2 interacting protein 3 [Source:HGNC Symbol;Acc:HGNC:1084]	rs12764703	0.000595169	3.22536	CELLULAR_CATABOLIC_PROCESS
ACACA	acetyl-CoA carboxylase alpha [Source:HGNC Symbol;Acc:HGNC:84]	rs12939217	0.000602088	3.22034	LIGASE_ACTIVITY
CHRM3	cholinergic receptor muscarinic 3 [Source:HGNC Symbol;Acc:HGNC:1952]	rs7518749	0.000622468	3.20588	HSA04080_NEUROACTIVE_LIGAND_RECEPTOR_INTERACTION
CREG1	cellular repressor of E1A stimulated genes 1 [Source:HGNC Symbol;Acc:HGNC:2351]	rs63560662	0.000622614	3.20578	TRANSCRIPTION_REPRESSOR_ACTIVITY
ERBB4	erb-b2 receptor tyrosine kinase 4 [Source:HGNC Symbol;Acc:HGNC:3432]	rs1402767	0.000650108	3.18701	SIG_PIP3_SIGNALING_IN_CARDIAC_MYOCTES
ALDH1L1	aldehyde dehydrogenase 1 family member L1 [Source:HGNC Symbol;Acc:HGNC:3978]	rs4679103	0.000651183	3.1863	CELLULAR_CATABOLIC_PROCESS
EDNRA	endothelin receptor type A [Source:HGNC Symbol;Acc:HGNC:3179]	rs6840108	0.000660538	3.1801	REGULATION OF BLOOD PRESSURE
GABRB1	gamma-aminobutyric acid type A receptor beta1 subunit [Source:HGNC Symbol;Acc:HGNC:4081]	rs3098802	0.000673949	3.17137	GAMMA-AMINOBUTYRIC ACID SIGNALING PATHWAY
XRCC4	X-ray repair cross complementing 4 [Source:HGNC Symbol;Acc:HGNC:12831]	rs10514249	0.000680556	3.16714	LIGASE_ACTIVITY
PTGS1	prostaglandin-endoperoxide synthase 1 [Source:HGNC Symbol;Acc:HGNC:9604]	rs56001147	0.000686537	3.16334	OXIDOREDUCTASE_ACTIVITY
KPNA2	karyopherin subunit alpha 2 [Source:HGNC Symbol;Acc:HGNC:6395]	rs62085668	0.000698271	3.15598	INTERPHASE_OF_MITOTIC_CELL_CYCLE
KMO	kynurenine 3-monooxygenase [Source:HGNC Symbol;Acc:HGNC:6381]	rs3007737	0.000706834	3.15068	OXIDOREDUCTASE_ACTIVITY
SFTPD	surfactant protein D [Source:HGNC Symbol;Acc:HGNC:10803]	rs61860860	0.000716121	3.14501	SUGAR_BINDING
GABRA2	gamma-aminobutyric acid type A receptor alpha2 subunit [Source:HGNC Symbol;Acc:HGNC:4076]	rs12504586	0.000716953	3.14451	GAMMA-AMINOBUTYRIC ACID SIGNALING PATHWAY
OPCML	opioid binding protein/cell adhesion molecule like [Source:HGNC Symbol;Acc:HGNC:8143]	rs12364817	0.000720431	3.14241	CELL_RECOGNITION
PTGER2	prostaglandin E receptor 2 [Source:HGNC Symbol;Acc:HGNC:9594]	rs7145700	0.000748106	3.12604	NEUROACTIVE_LIGAND_RECEPTOR_INTERACTION
RYBP	RING1 and YY1 binding protein [Source:HGNC Symbol;Acc:HGNC:10480]	rs11920802	0.0007496	3.12517	TRANSCRIPTION_REPRESSOR_ACTIVITY
GALR1	galanin receptor 1 [Source:HGNC Symbol;Acc:HGNC:4132]	rs73490304	0.000753551	3.12289	SIGNAL TRANSDUCTION
PNPLA3	patatin like phospholipase domain containing 3 [Source:HGNC Symbol;Acc:HGNC:18590]	rs2294919	0.000790742	3.10197	CELLULAR_CATABOLIC_PROCESS
PAK2	p21 (RAC1) activated kinase 2 [Source:HGNC Symbol;Acc:HGNC:8591]	rs9820690	0.000791067	3.10179	SIG_PIP3_SIGNALING_IN_CARDIAC_MYOCTES
SOS2	SOS Ras/Rho guanine nucleotide exchange factor 2 [Source:HGNC Symbol;Acc:HGNC:11188]	rs3759595	0.000813491	3.08965	SIG_PIP3_SIGNALING_IN_CARDIAC_MYOCTES
SYNRG	synergin gamma	rs12602776	0.000835655	3.07797	BLOOD_COAGULATION
NBEA	neurobeachin [Source:HGNC Symbol;Acc:HGNC:7648]	rs1777668	0.000843759	3.07378	GOLGI_APPARATUS_PART
SLC22A2	solute carrier family 22 member 2 [Source:HGNC Symbol;Acc:HGNC:10966]	rs476235	0.000869547	3.06071	REGULATION_OF_BODY_FLUID_LEVELS
FBXW11	F-box and WD repeat domain containing 11 [Source:HGNC Symbol;Acc:HGNC:13607]	rs702095	0.000877879	3.05657	HSA04340_HEDGEHOG_SIGNALING_PATHWAY
SCTR	secretin receptor [Source:HGNC Symbol;Acc:HGNC:10608]	rs2043868	0.000881303	3.05487	CELL SURFACE RECEPTOR SIGNALING
SQSTM1	sequestosome 1 [Source:HGNC Symbol;Acc:HGNC:11280]	rs155788	0.00089335	3.04898	CELLULAR_MACROMOLECULE_CATABOLIC_PROCESS
KLRB1	killer cell lectin like receptor B1 [Source:HGNC Symbol;Acc:HGNC:6373]	rs71428248	0.000895652	3.04786	SUGAR_BINDING
CTRC	chymotrypsin C [Source:HGNC Symbol;Acc:HGNC:2523]	rs6693417	0.000901869	3.04486	PROTEOLYSIS
CRHR1	corticotropin releasing hormone receptor 1 [Source:HGNC Symbol;Acc:HGNC:2357]	rs12942300	0.000922945	3.03482	NEUROACTIVE_LIGAND_RECEPTOR_INTERACTION
CUL2	cullin 2 [Source:HGNC Symbol;Acc:HGNC:2552]	rs7478591	0.000942999	3.02549	G1_S_TRANSITION_OF_MITOTIC_CELL_CYCLE
