# Supplementary figures and images for: The genomic landscape of human cellular circadian variation points to a novel role for the signalosome
Source: eLife journal article supplement (doi:10.7554/elife.24994), 2017-09-04

Figure 1- figure supplement 1

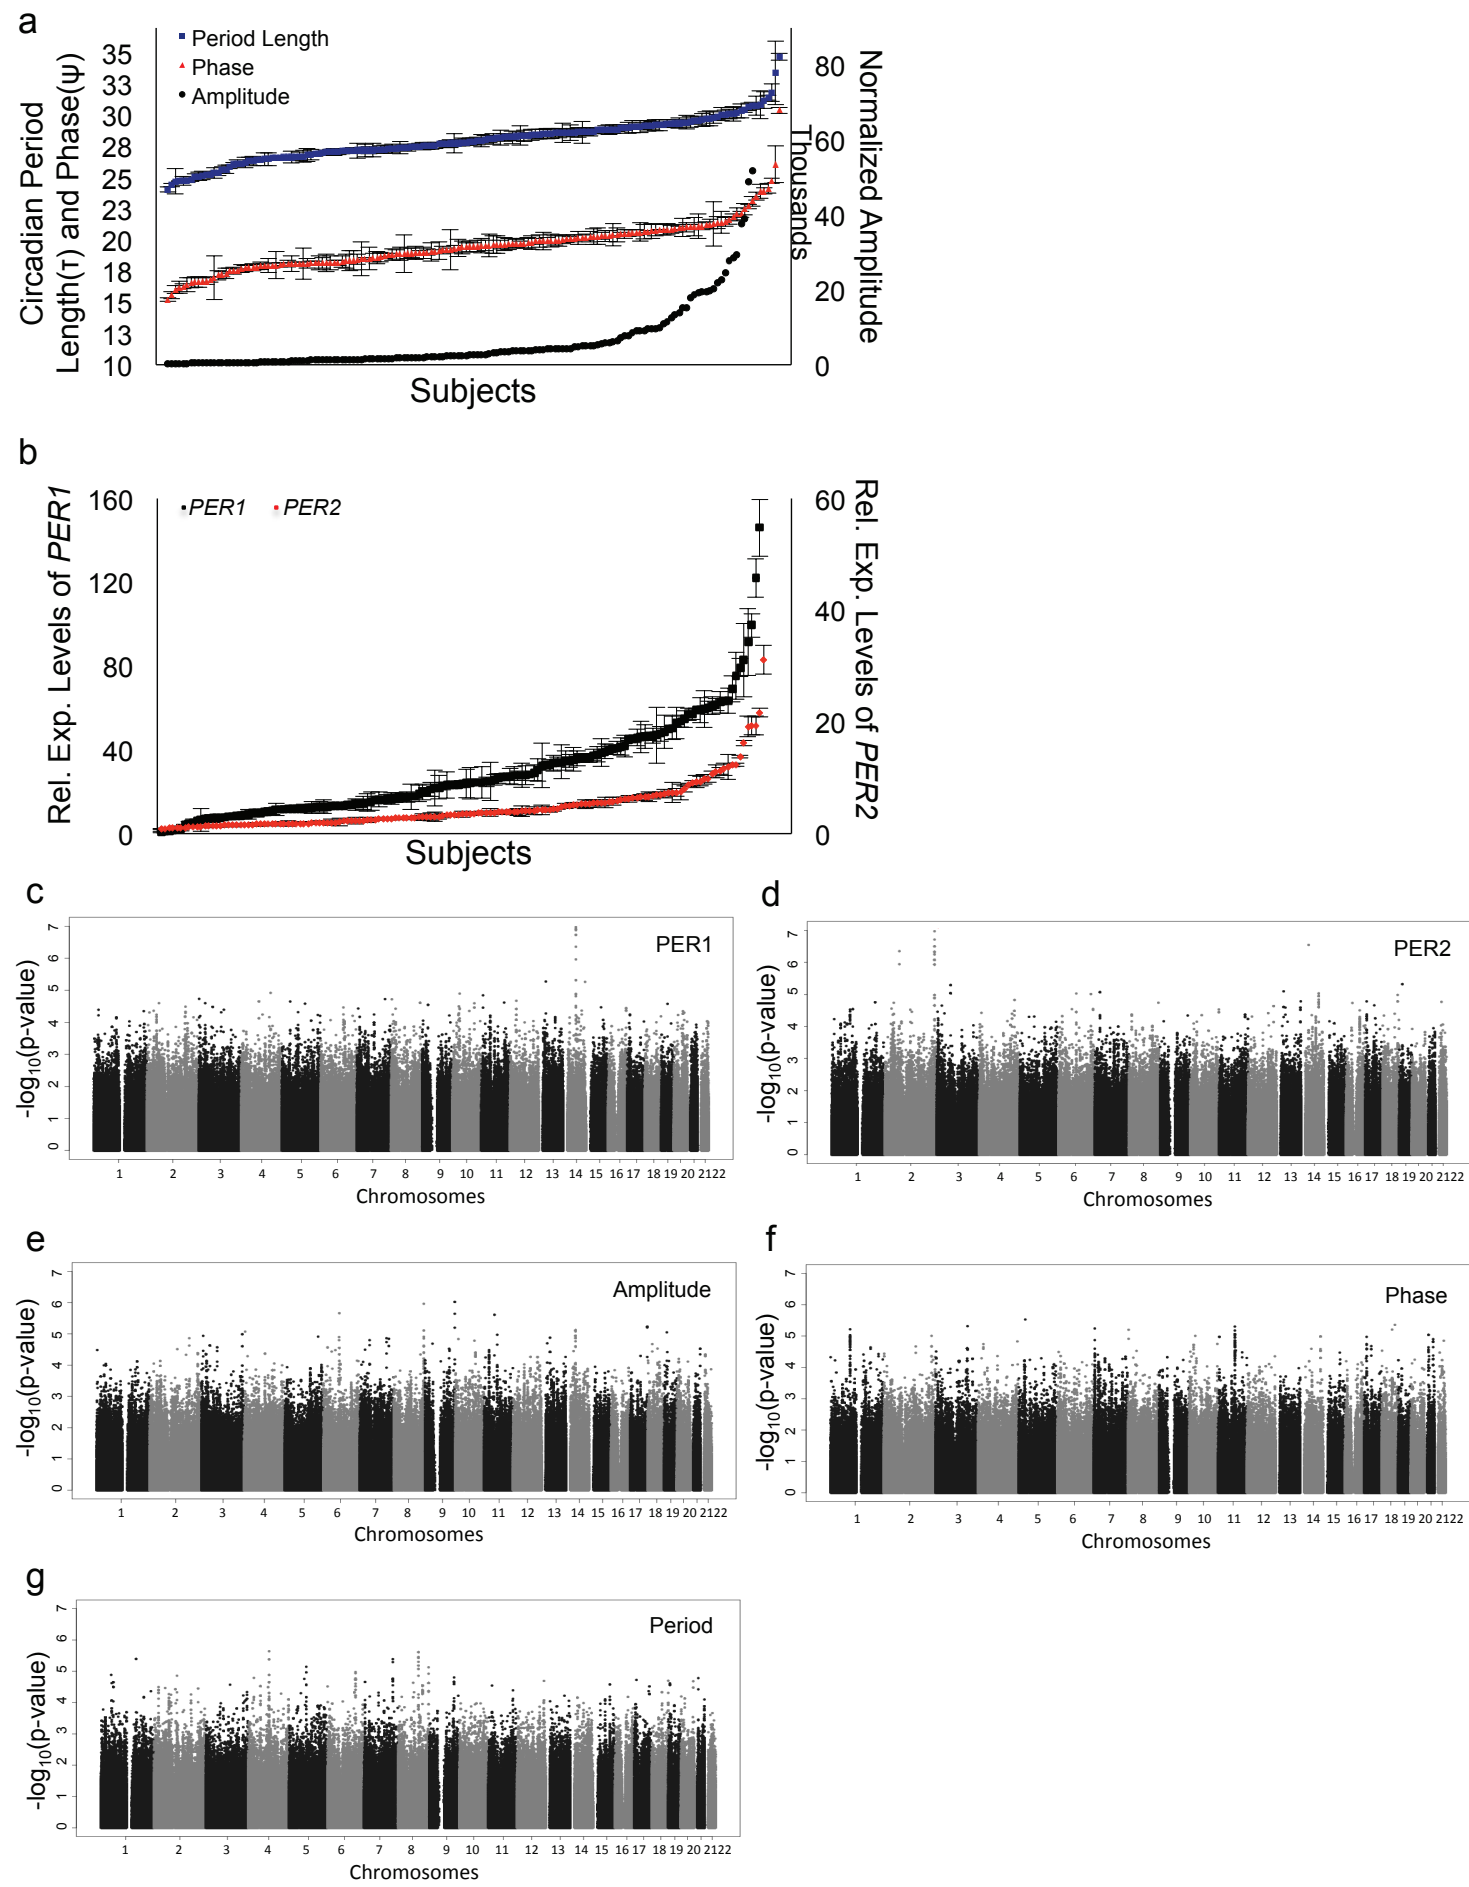

Supplement: supp [file elife_poa_e24994_Figure_1_figure_supplement_1.pdf › elife_poa_e24994_Figure_1_figure_supplement_1.pdf]

Figure 1-figure supplement 2

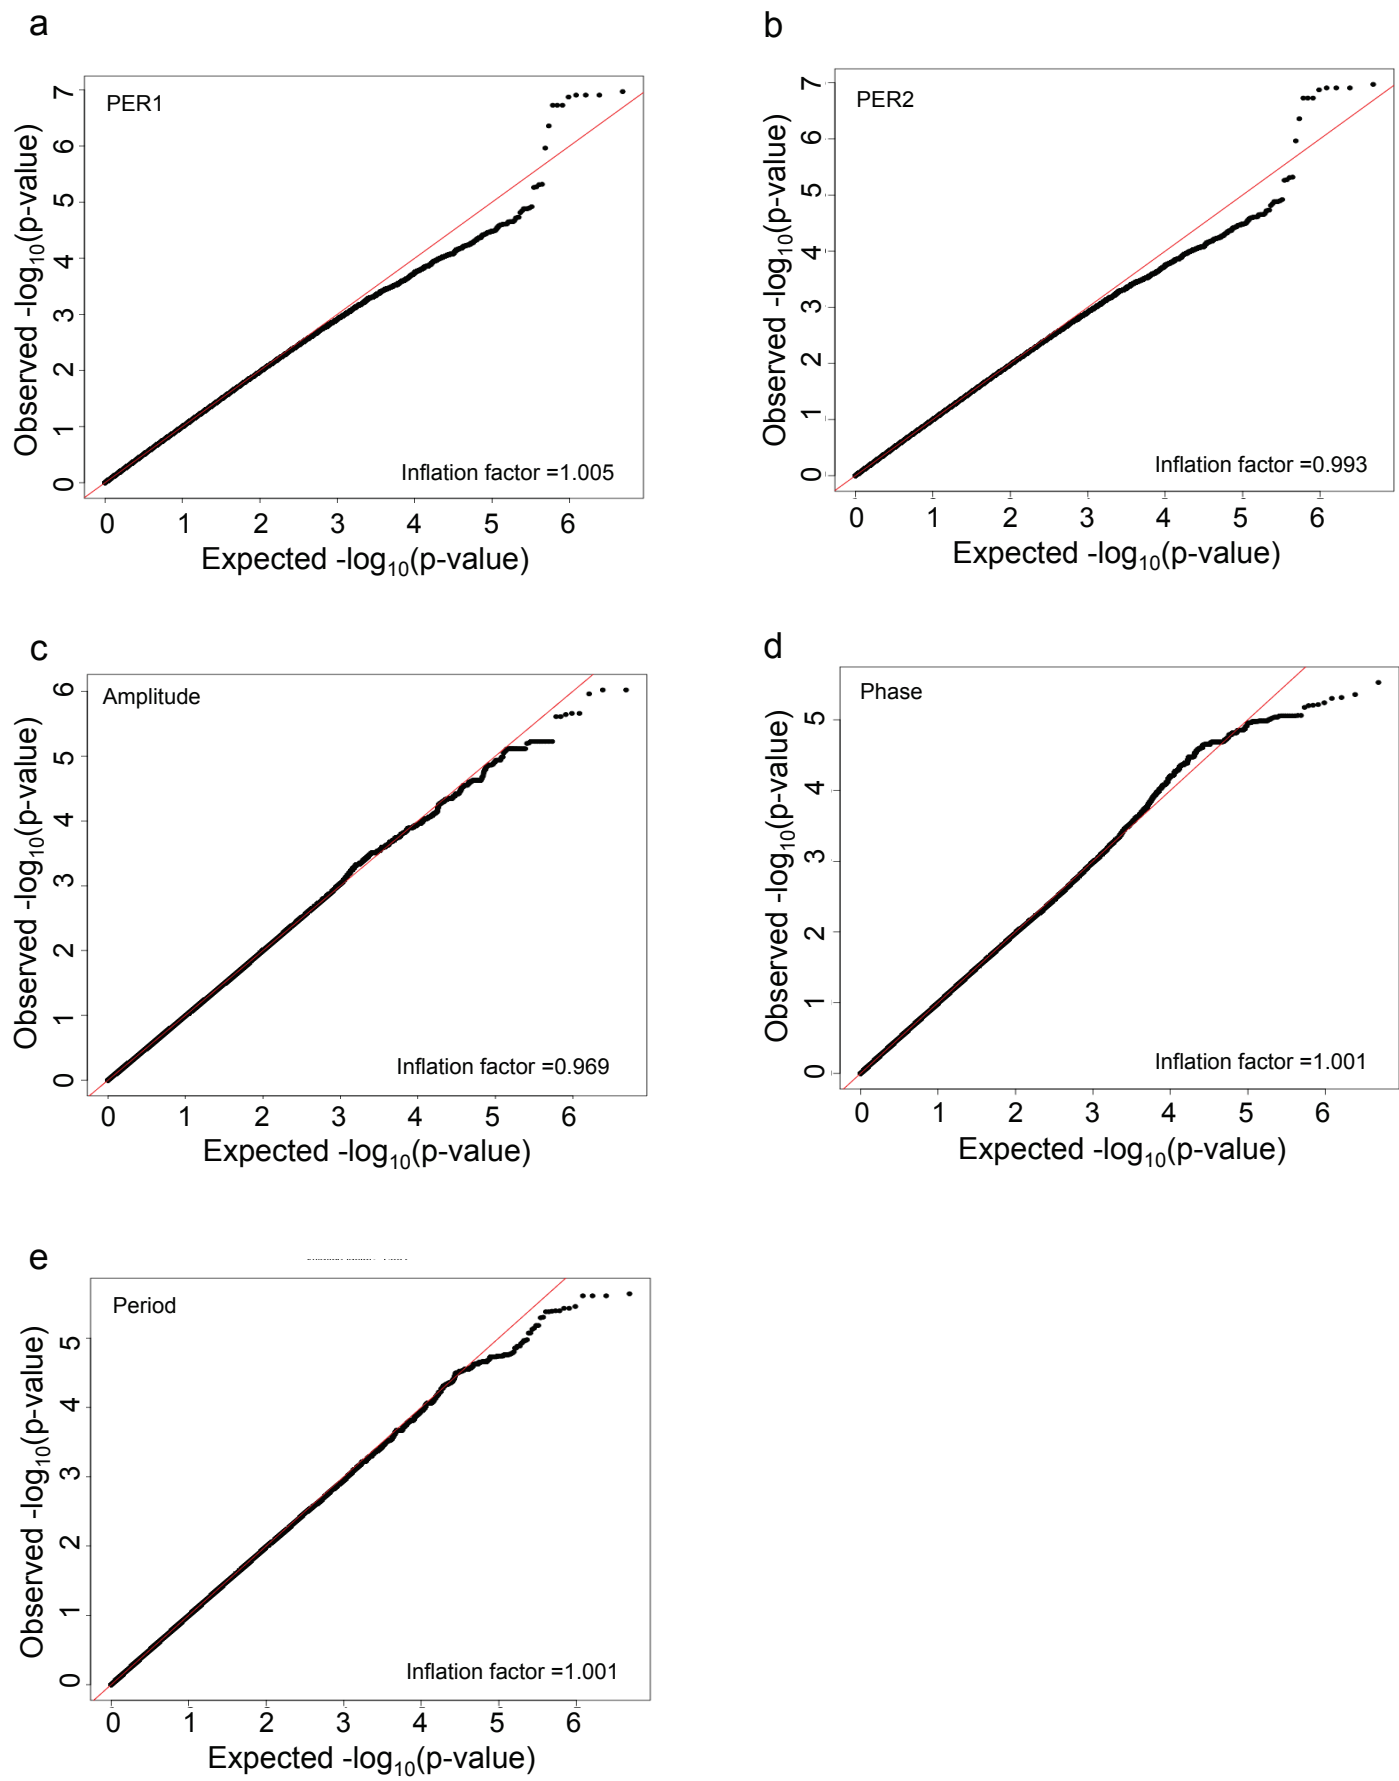

Supplement: supp [file elife_poa_e24994_Figure_1_figure_supplement_2.pdf › elife_poa_e24994_Figure_1_figure_supplement_2.pdf]

Figure 1-figure supplement 3

a

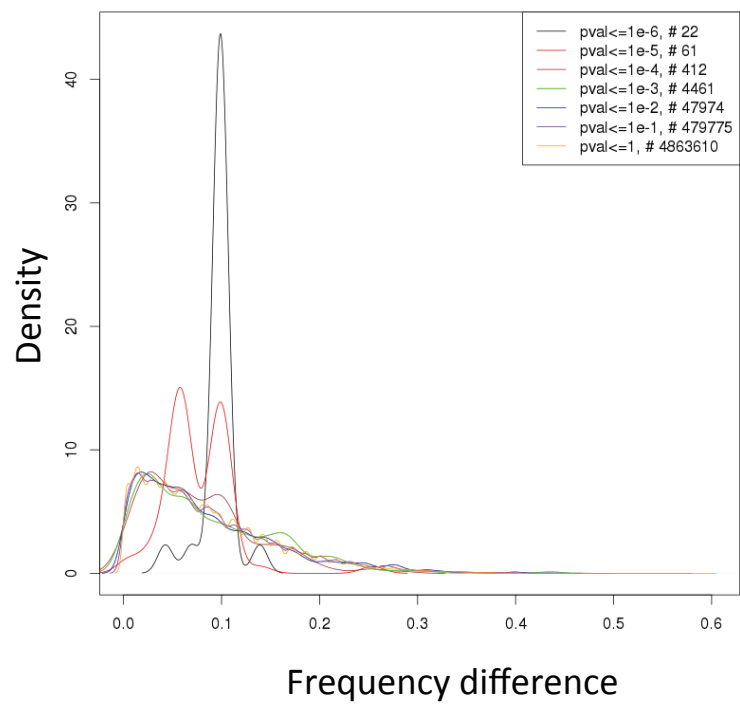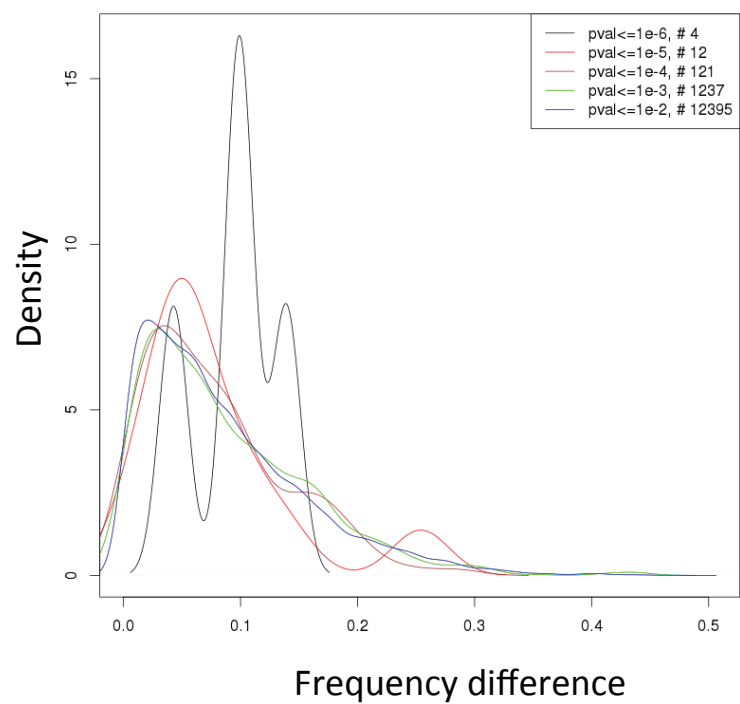

Supplement: supp [file elife_poa_e24994_Figure_1_figure_supplement_3.pdf › elife_poa_e24994_Figure_1_figure_supplement_3.pdf]

Figure 2-figure supplement 1

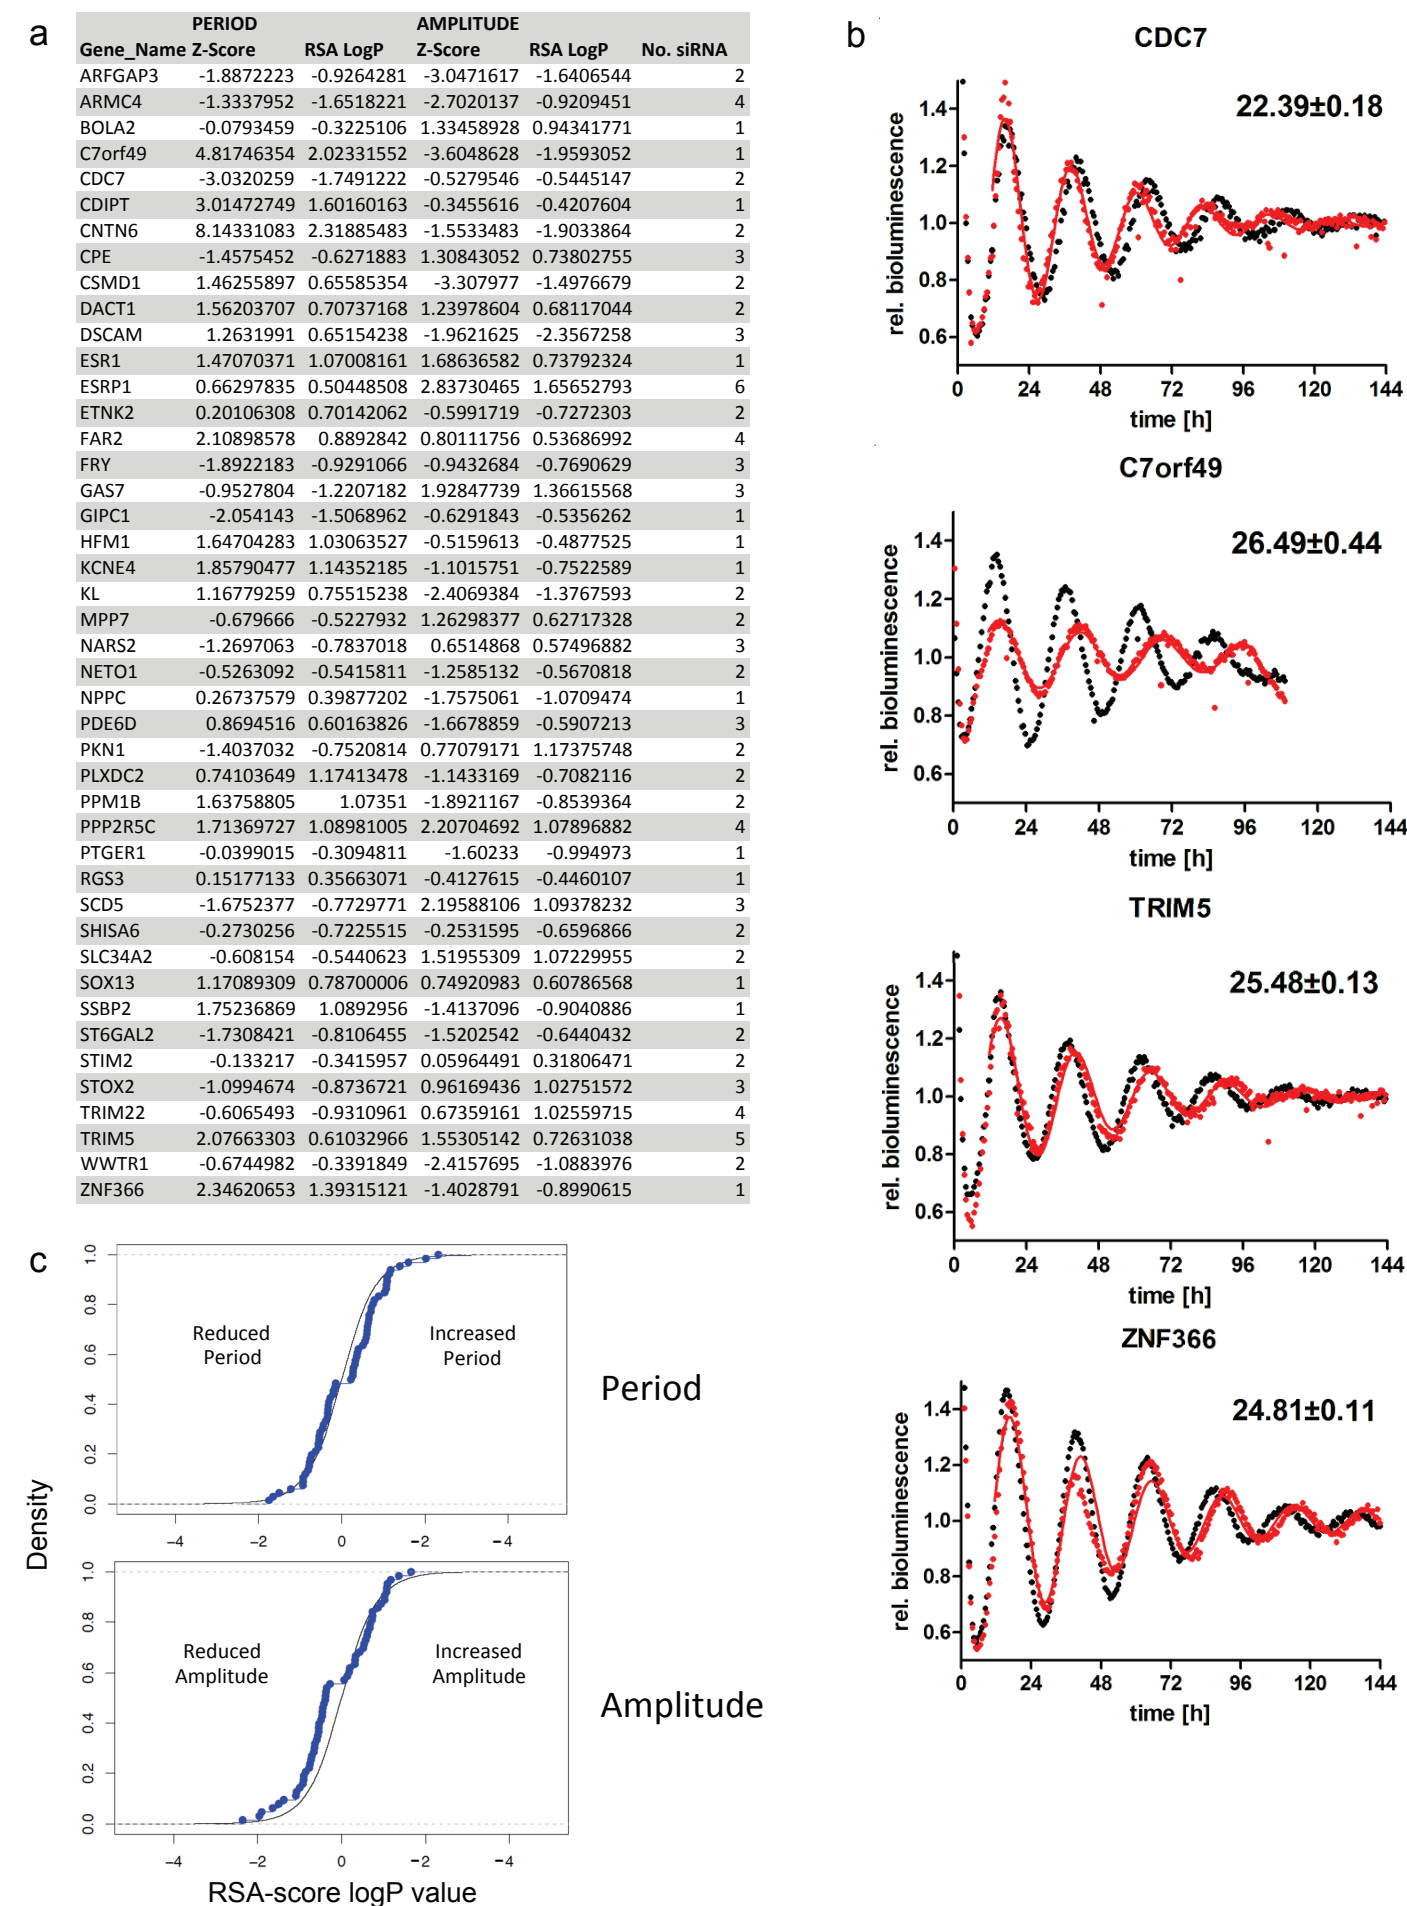

Supplement: supp [file elife_poa_e24994_Figure_2_figure_supplement_1.pdf › elife_poa_e24994_Figure_2_figure_supplement_1.pdf]

Figure 3-figure supplement 1

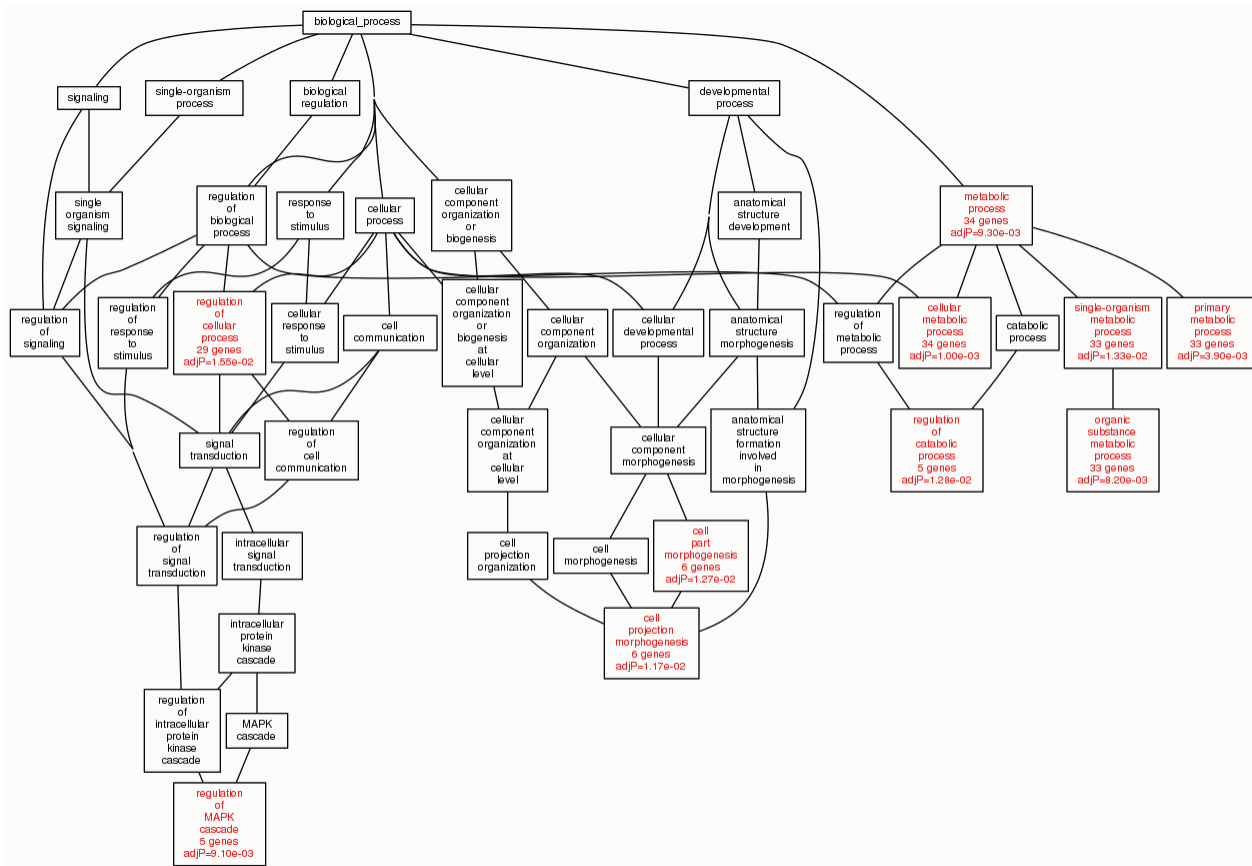

Supplement: supp [file elife_poa_e24994_Figure_3_figure_supplement_1.pdf › elife_poa_e24994_Figure_3_figure_supplement_1.pdf]

Figure 3-figure supplement 2

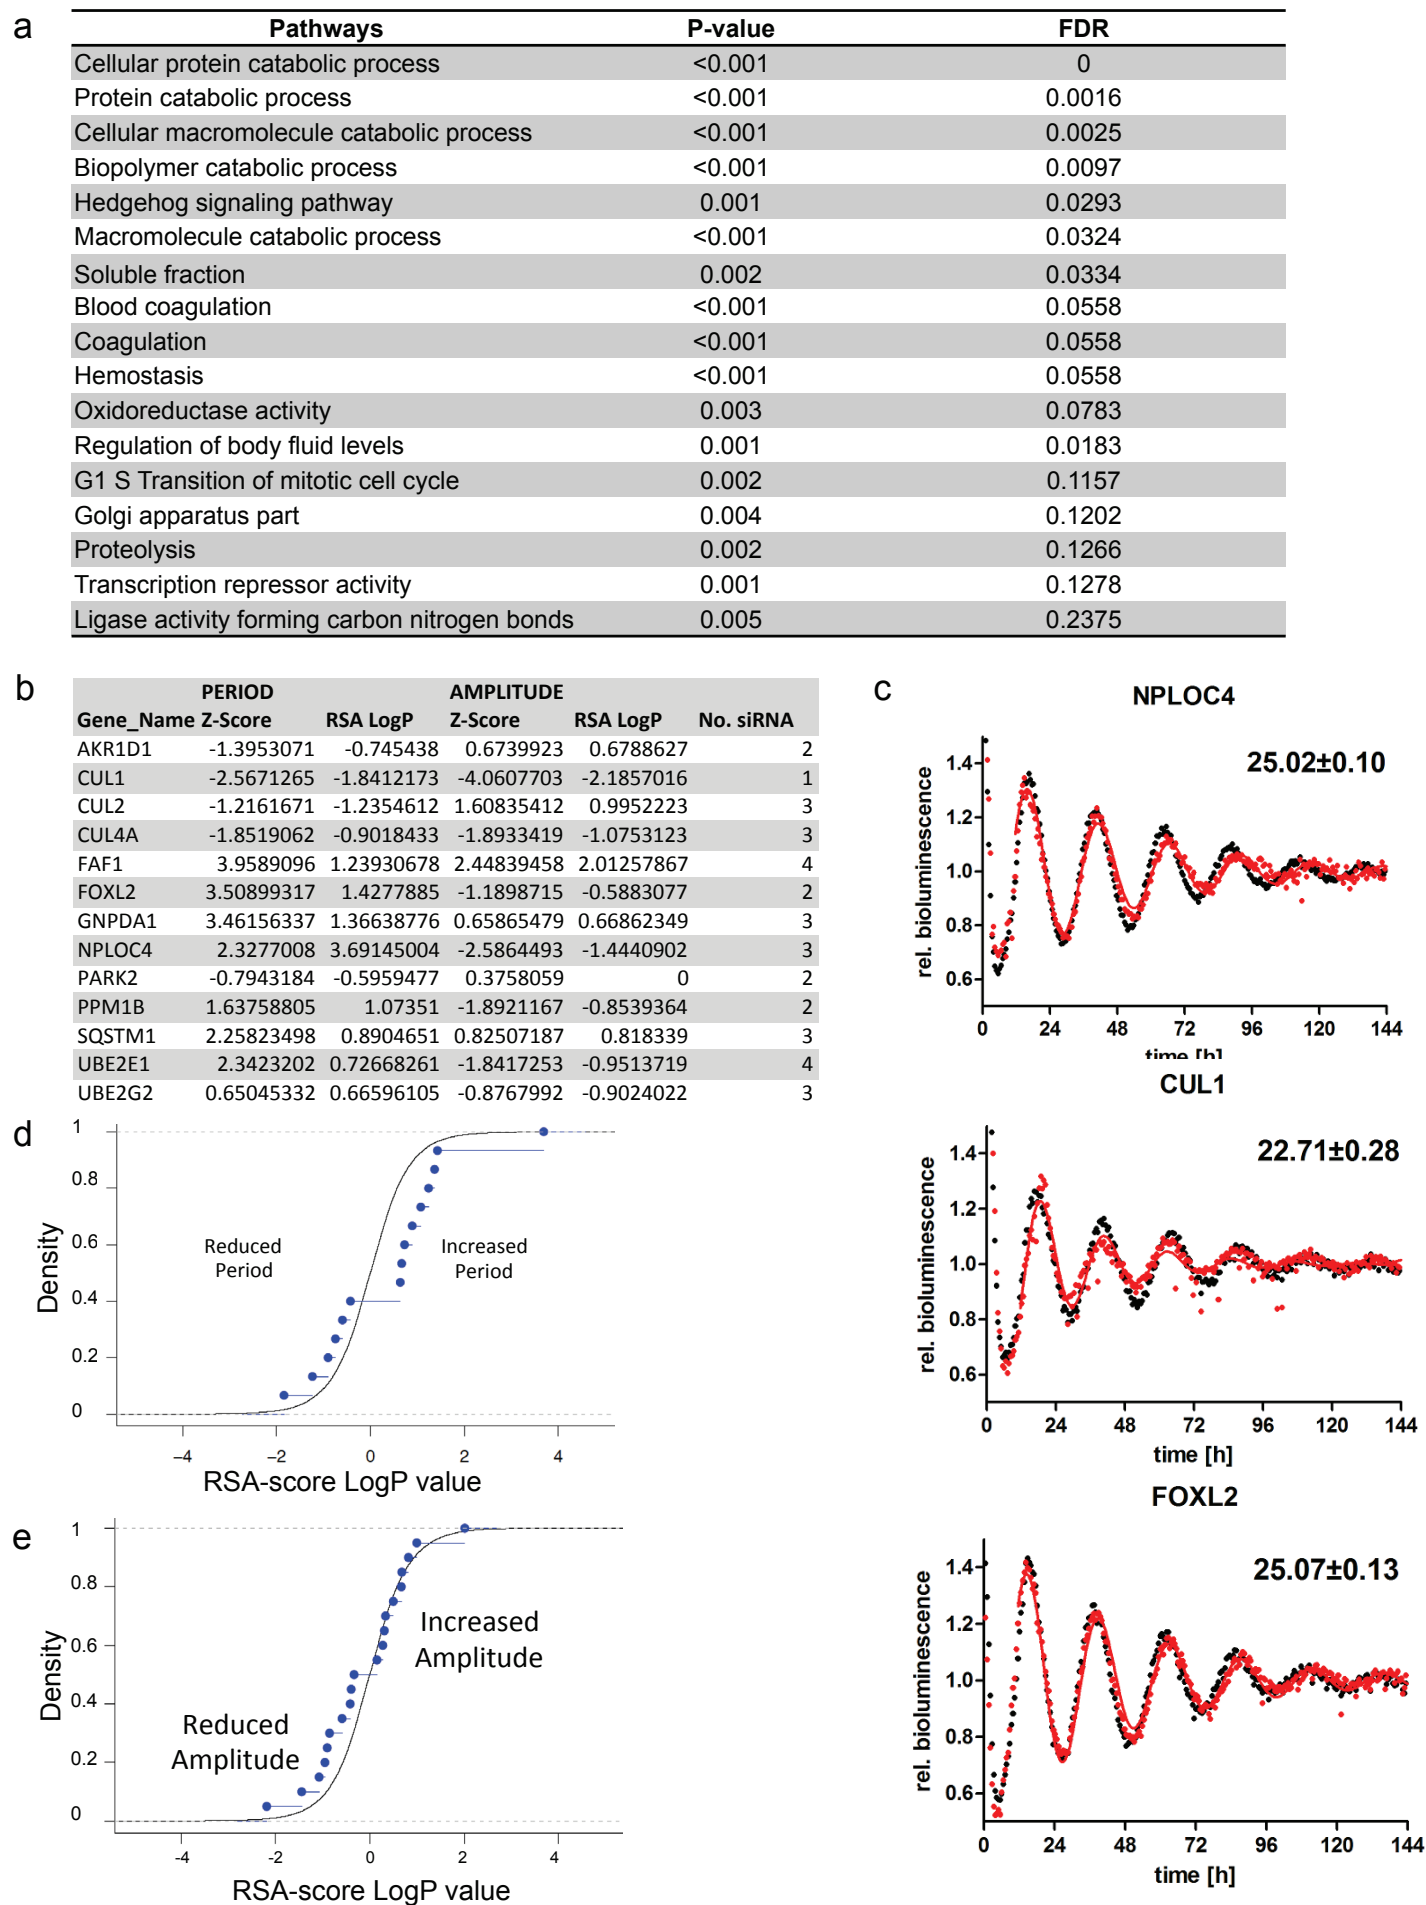

Supplement: supp [file elife_poa_e24994_Figure_3_figure_supplement_2.pdf › elife_poa_e24994_Figure_3_figure_supplement_2.pdf]

Figure 4-figure supplement 1

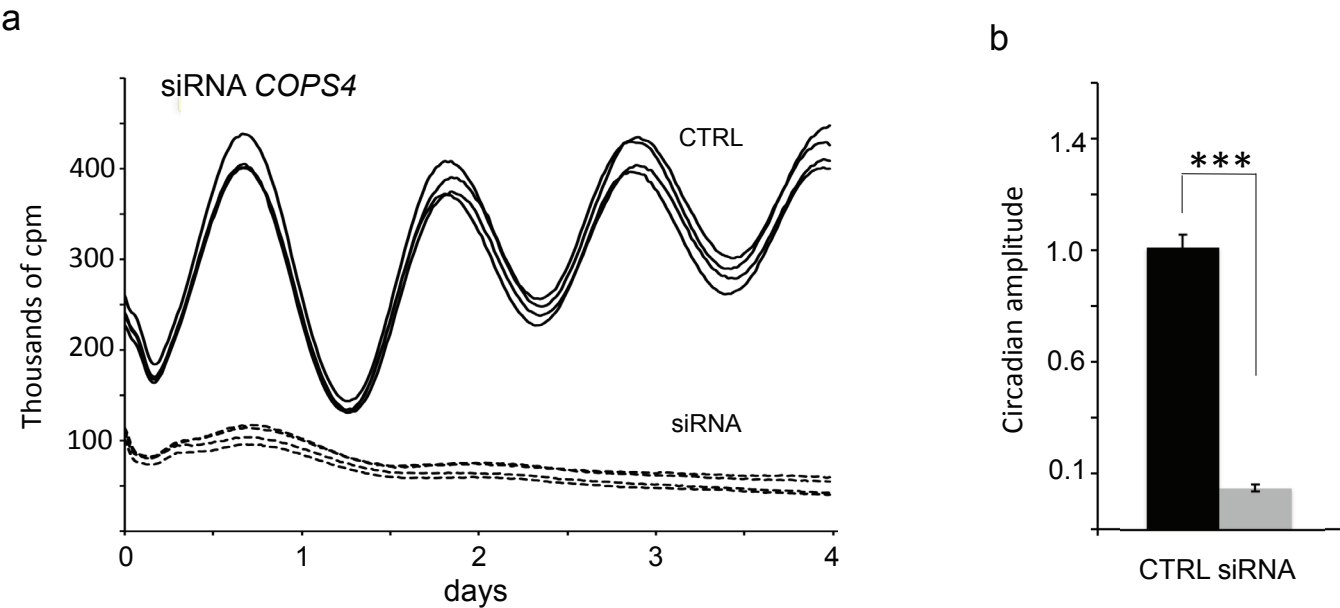

Supplement: supp [file elife_poa_e24994_Figure_4_figure_supplement_1.pdf › elife_poa_e24994_Figure_4_figure_supplement_1.pdf]

Figure 5-figure supplement 1

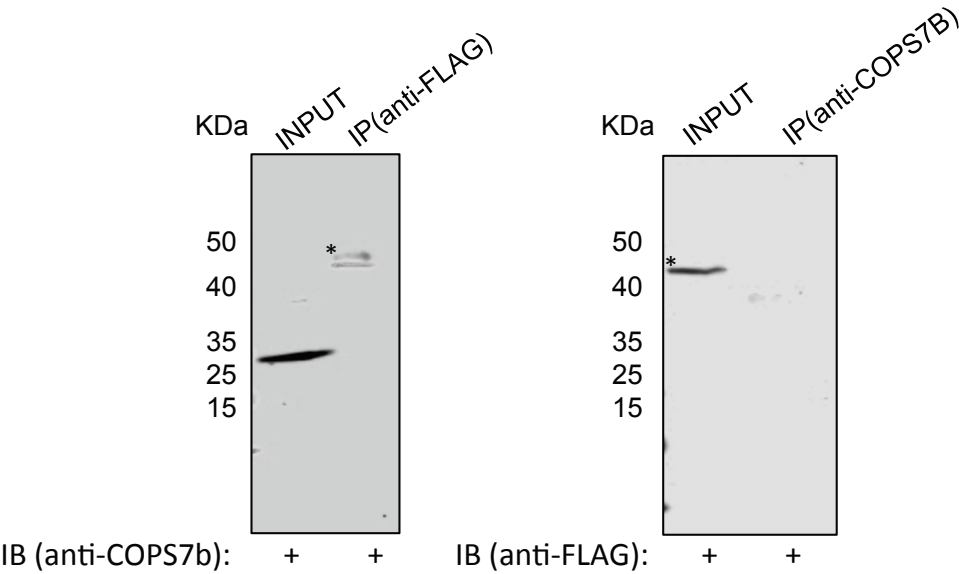

Supplement: supp [file elife_poa_e24994_Figure_5_figure_supplement_1.pdf › elife_poa_e24994_Figure_5_figure_supplement_1.pdf]

Figure 5-figure supplement 2

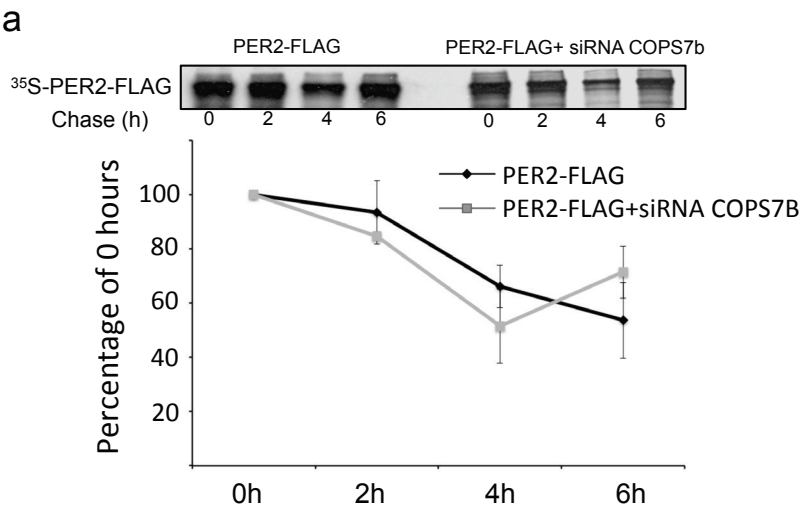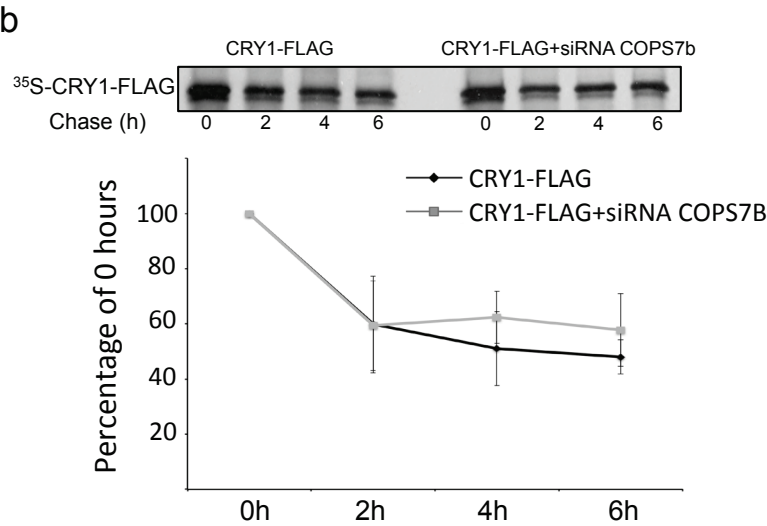

Supplement: supp [file elife_poa_e24994_Figure_5_figure_supplement_2.pdf › elife_poa_e24994_Figure_5_figure_supplement_2.pdf]

Figure 6-figure supplement 1

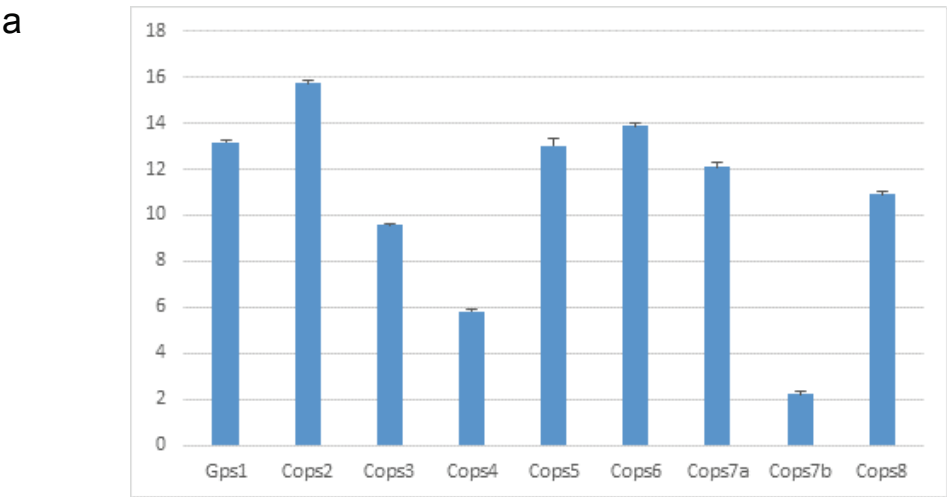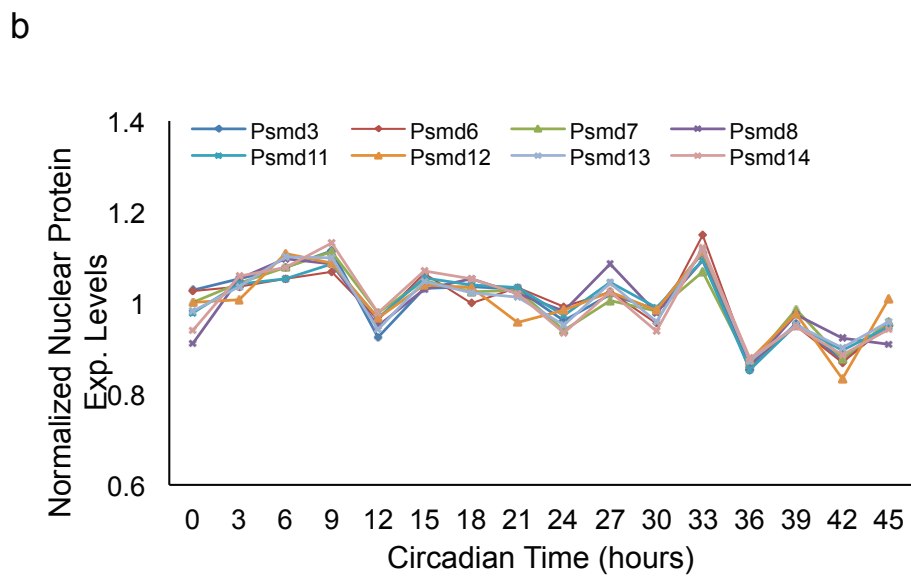

Supplement: supp [file elife_poa_e24994_Figure_6_figure_supplement_1.pdf › elife_poa_e24994_Figure_6_figure_supplement_1.pdf]
